# Supplementary material for: Wastewater Surveillance of Antimicrobial Resistance in Human Populations: A Systematic Review
Source: Preprints.org preprint supplement (doi:10.20944/preprints202010.0267.v1), 2020-10-13

## SUPPORTING MATERIAL

**Figure S1: Detailed screening flowchart**

Screening criteria described for all stages with numbers of passing/excluded records. Examples of excluded records are described at each stage.

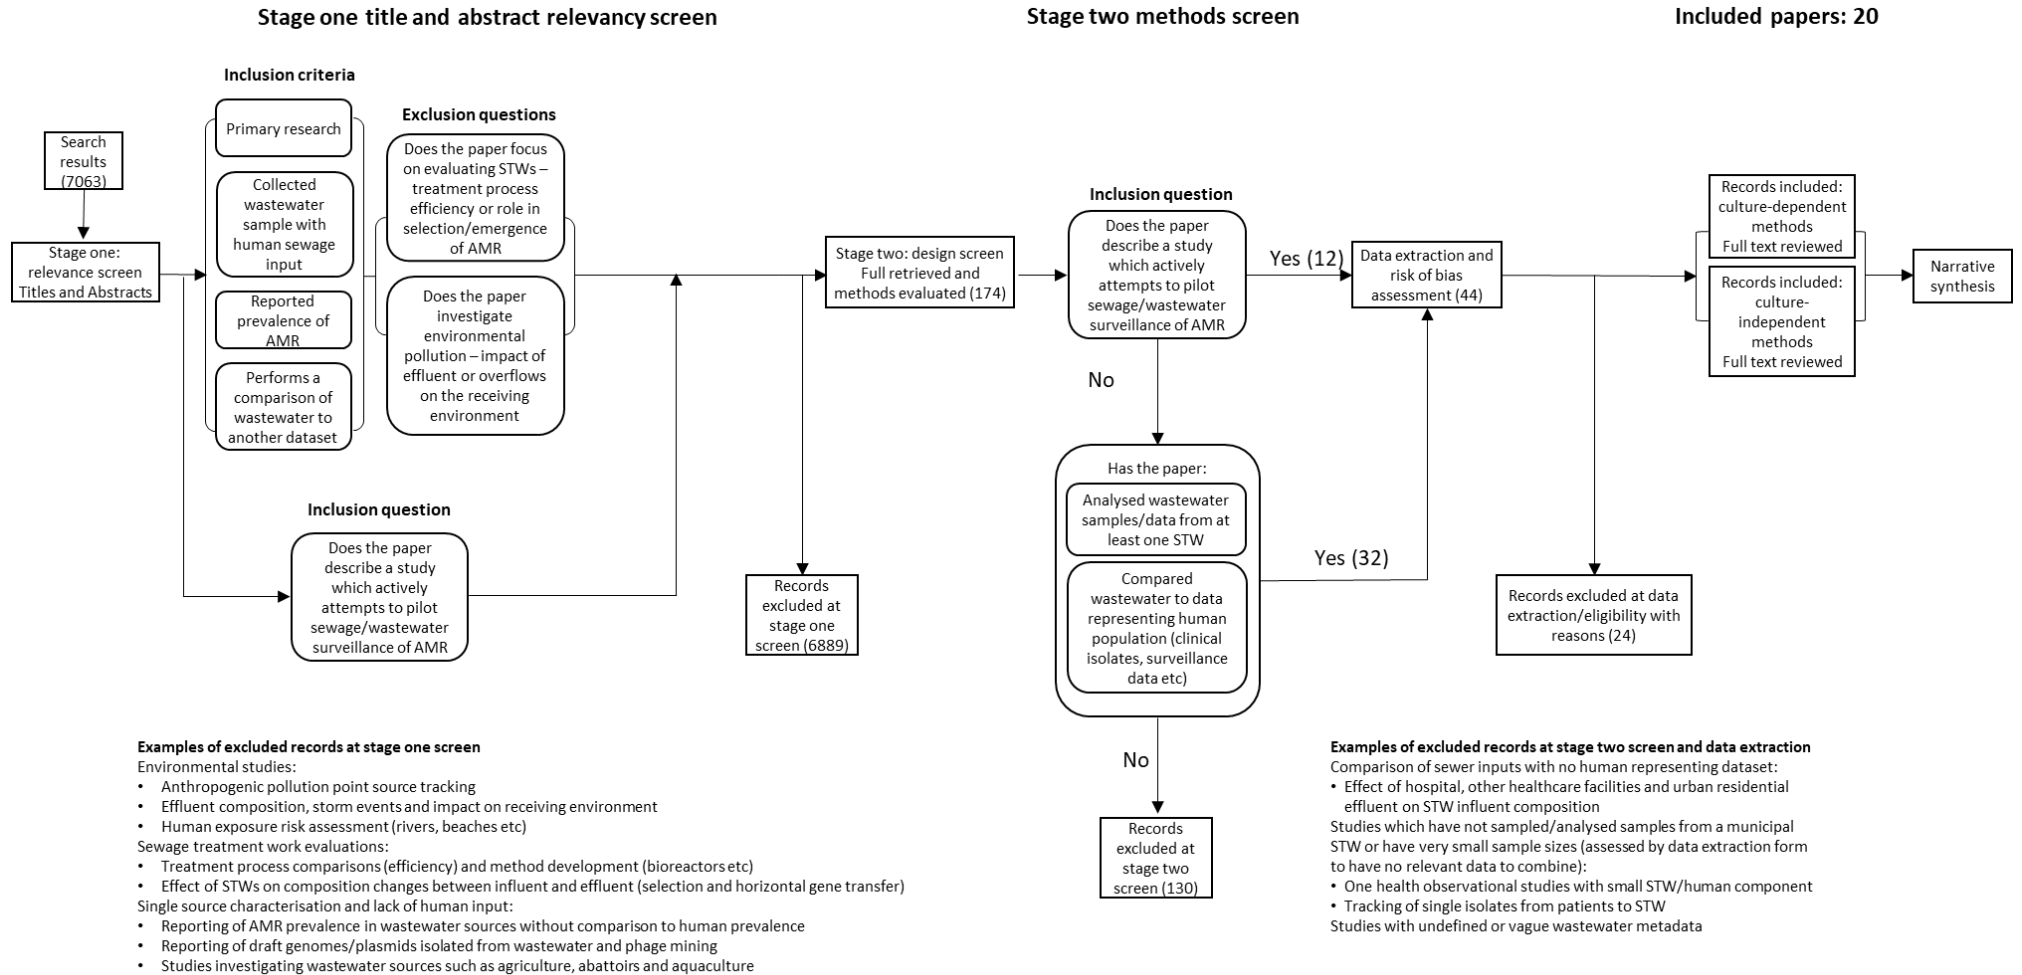

**Figure S2: Global density of wastewater sampling of included studies**

Count of studies sampling each country plotted by points on country centroids with size reflecting number of studies. World Bank income classifications by study was as follows: high income (n=14), middle income (n=8), low income (n=1).

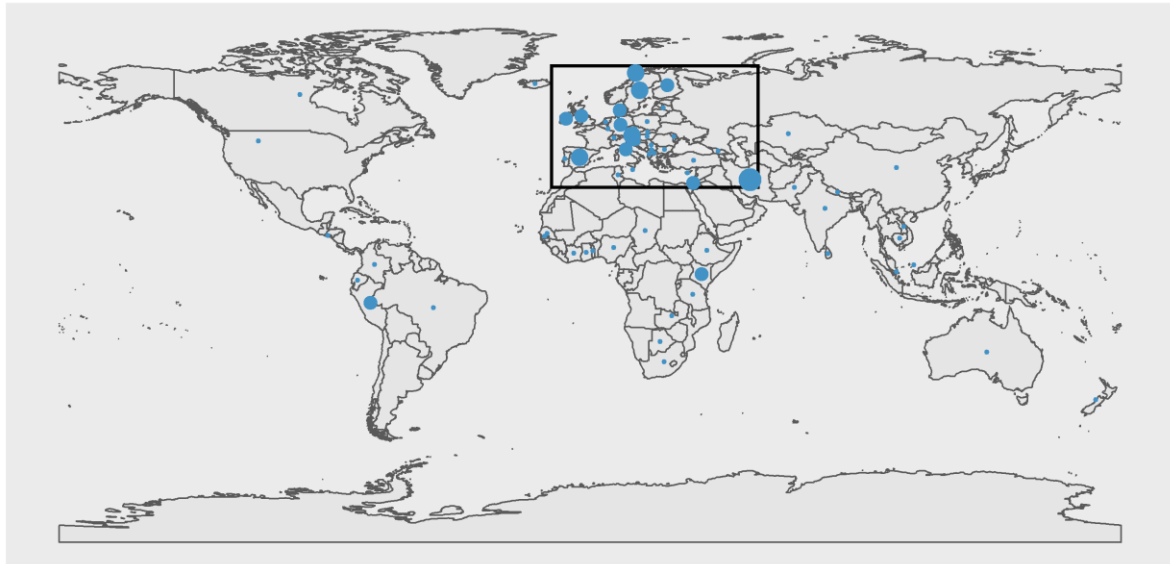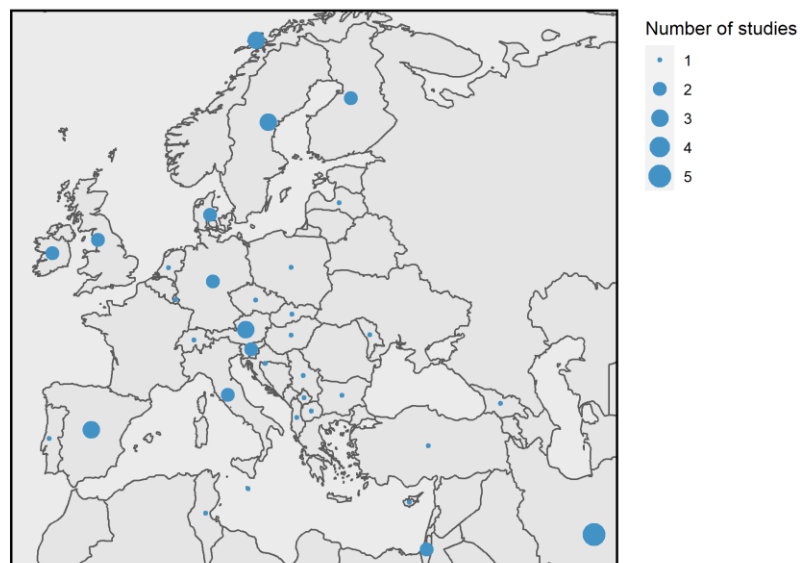

**Figure S3: Number of WwTWs sampled and number of wastewater samples collected for each study.**

Plotted by study outcome and AMR evaluation approach.

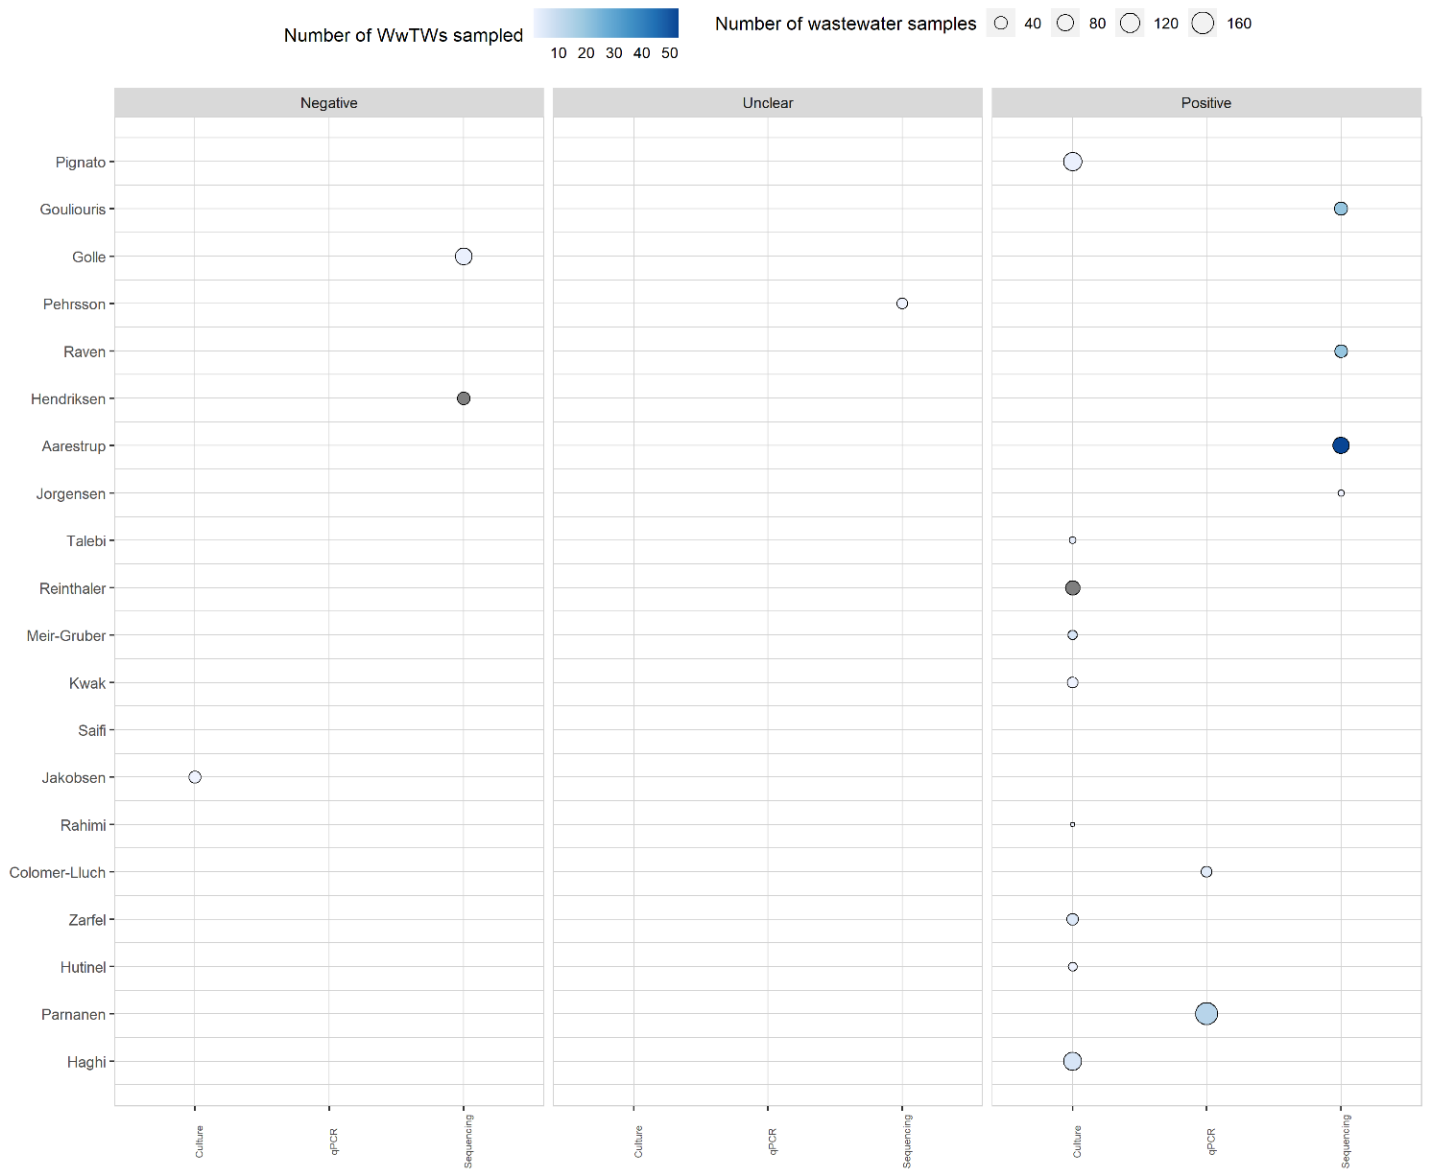

**Figure S4: WwTW population equivalent and flow for each study, where reported.**

Plotted by study outcome.

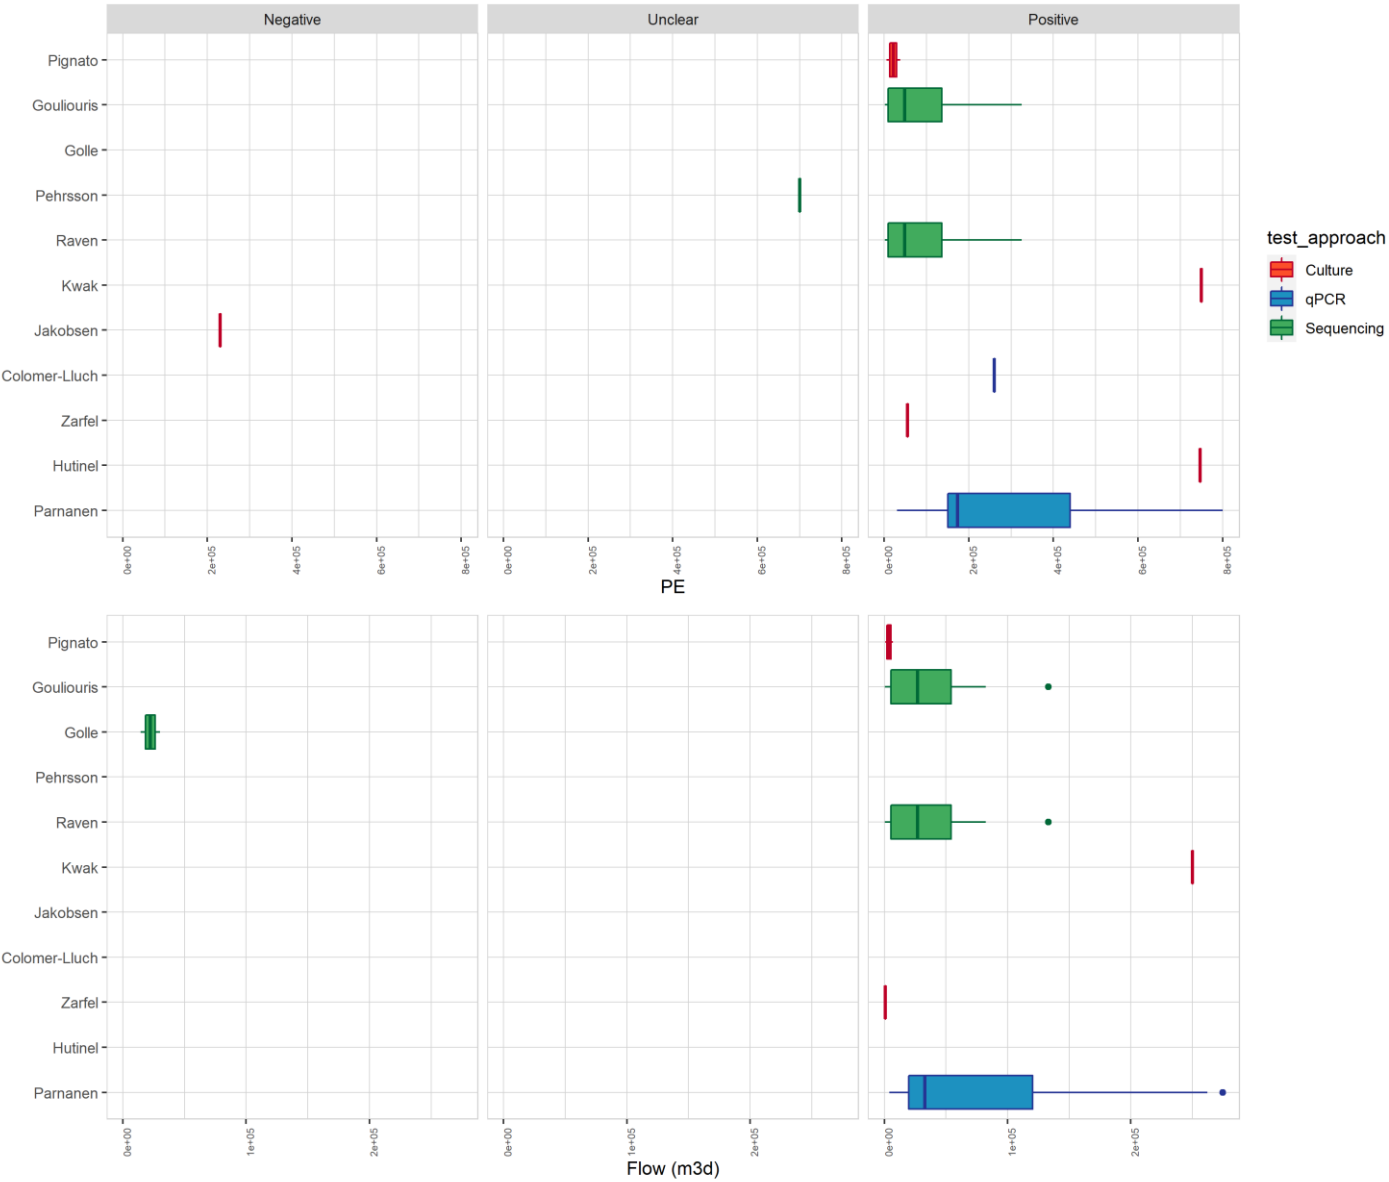

**Figure S5: Study organism, phenotype and genotype targets.**

Plotted by study outcome and AMR evaluation approach.

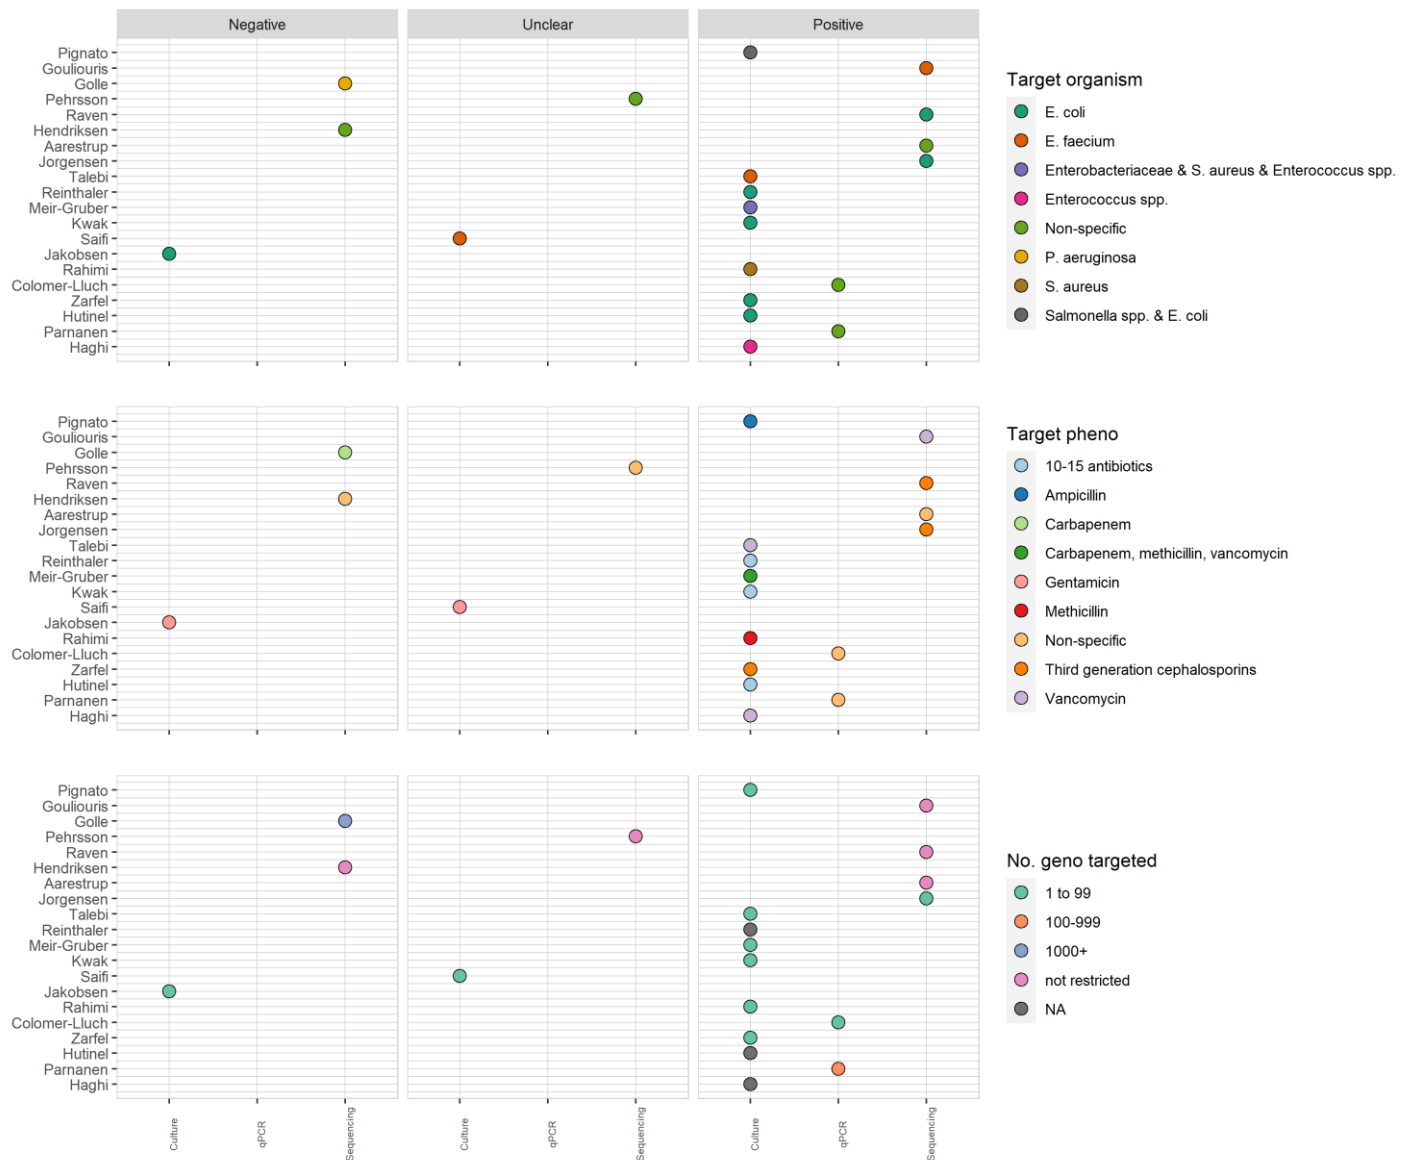

**Figure S6: Interactions between study features in relation to outcome, sampling point and AMR evaluation.**

Number of studies with a specific study feature (A=wastewater sampling approach (longitudinal vs snapshot), B = longitudinal timeframe, C = sampling method, D = direct vs indirect) plotted against study outcomes, wastewater sampling point and AMR evaluation approach. NAs represent studies without the plotted feature (e.g. snapshot studies for longitudinal timeframe) or did not report feature used. The bar heights represent the number of studies for a given comparison.

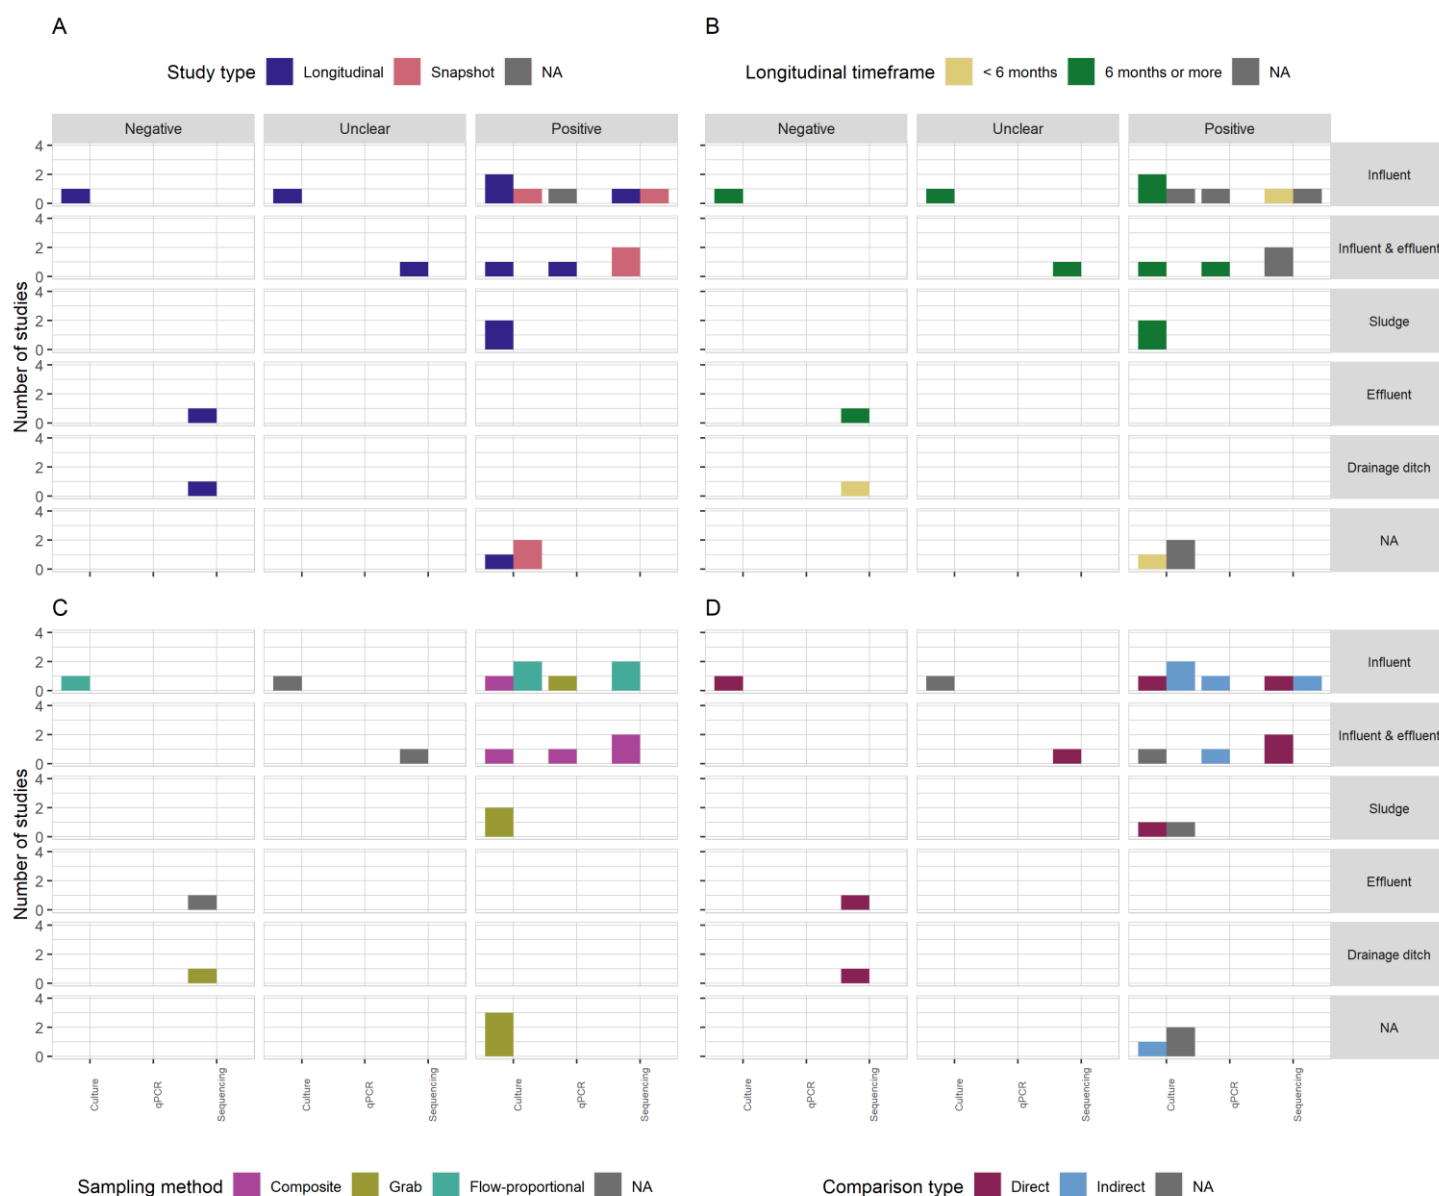

**Figure S7: Interactions between study features in relation to outcome, sampling point and AMR evaluation.**

Number of studies with a specific study feature (A=wastewater-based AMR surveillance as specified study aim - yes/no), B = distinct wastewater inputs, C = longitudinal sampling intervals, D = human comparison dataset description) plotted against study outcomes, wastewater sampling point and AMR evaluation approach. NAs represent studies without the plotted feature or did not report feature plotted (e.g. where no sewer input types were reported). The bar heights represent the number of studies for a given comparison.

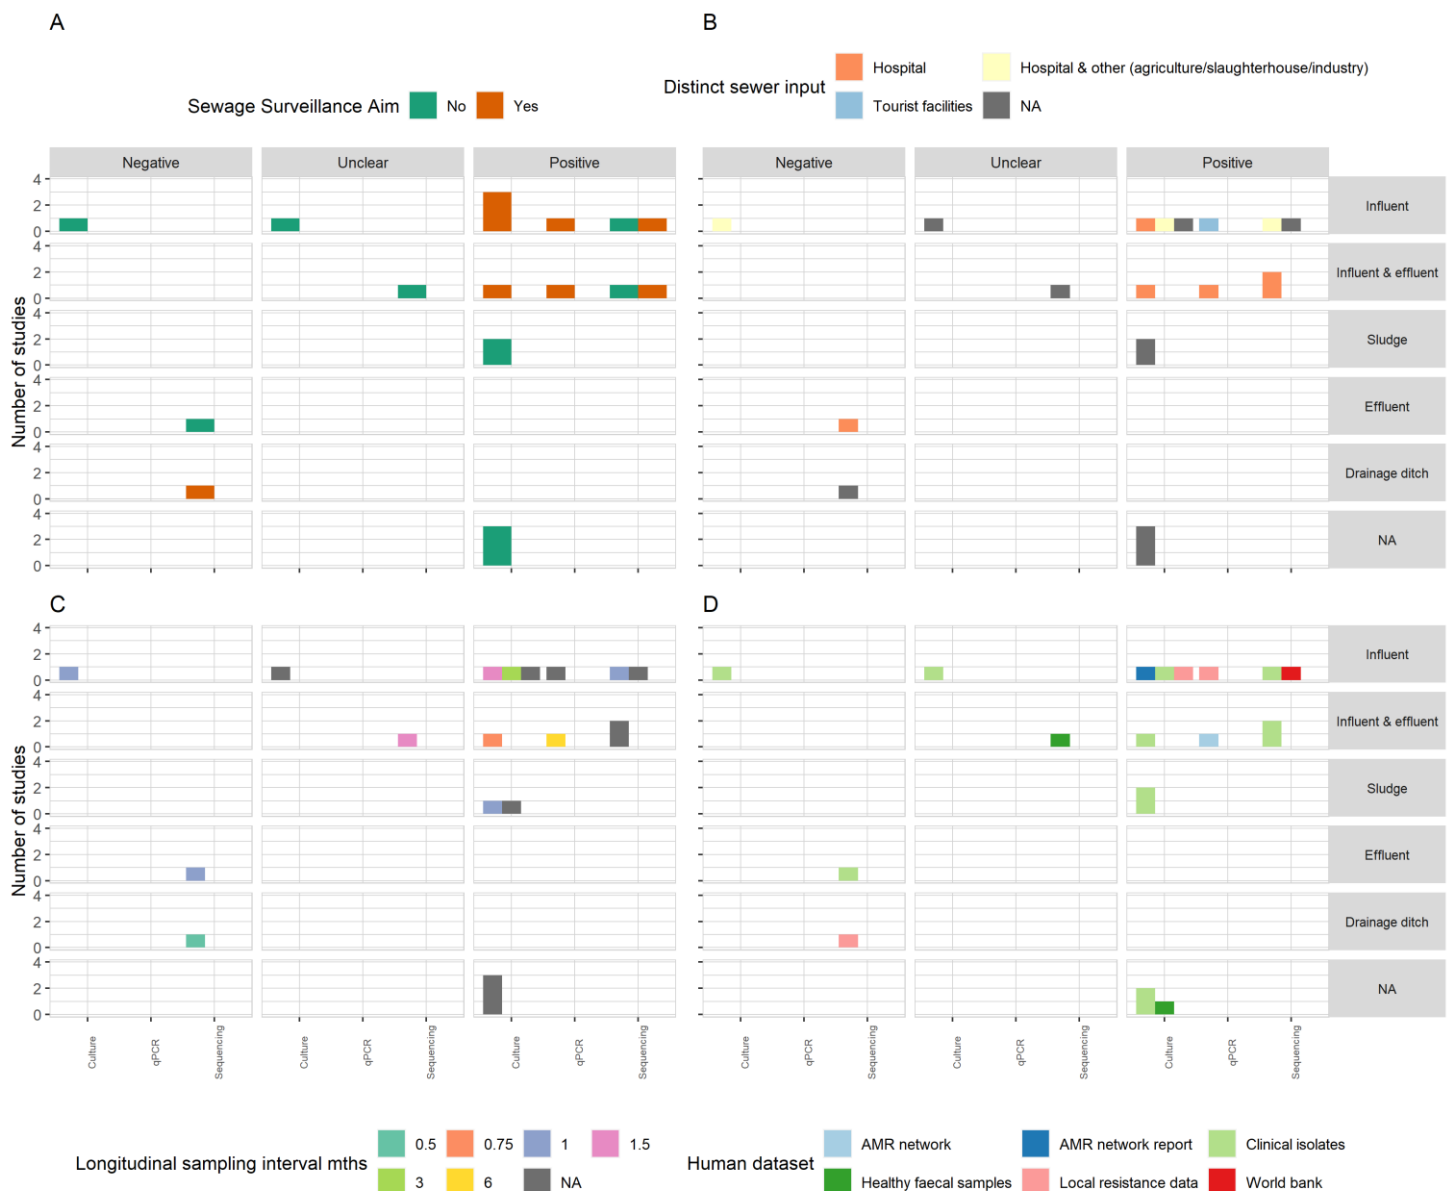

**Figure S8: Interactions between study features in relation to outcome, sampling point and AMR evaluation.**

Number of studies with a specific study feature (A=time to sample processing, B=number of sample freeze-thaws, C=sample filtration, D=sample storage) plotted against study outcomes, wastewater sampling point and AMR evaluation approach. NAs represent studies without the plotted feature or did not report feature plotted (e.g. where no storage details were reported). The bar heights represent the number of studies for a given comparison.

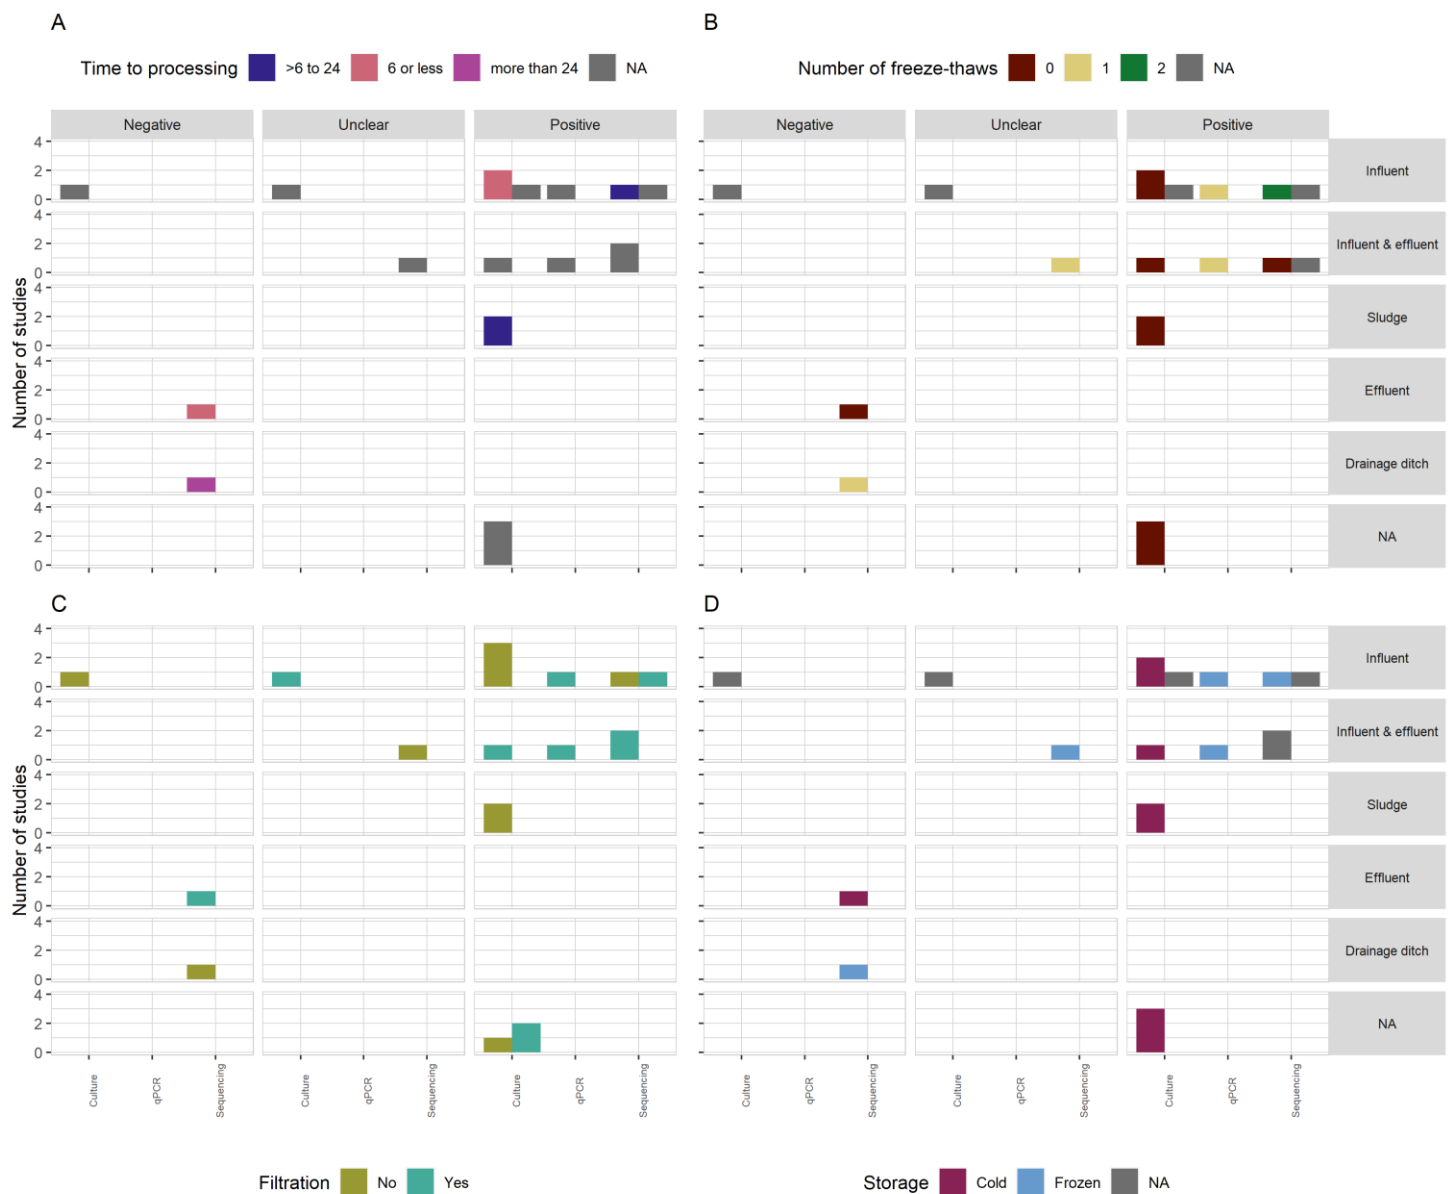

Supplement: Supplementary file 2 [file supplementary]
