# Supplementary material for: Wastewater Surveillance of Antimicrobial Resistance in Human Populations: A Systematic Review
Source: Preprints.org preprint supplement (doi:10.20944/preprints202010.0267.v1), 2020-10-13
Supplement: Supplementary file 1 [file supplementary]

## Full search strings

*Database: Medline (Ovid MEDLINE® Epub Ahead of Print, In-Process & Other Non-Indexed Citations, Ovid MEDLINE® Daily and Ovid MEDLINE®) 1946 to present*

*Search Strategy:*

- 
- 1 exp Drug Resistance, Bacterial/
  - 2 (AMR or ESBL or VRE or CPE or CRE or CRO or MDR or KPC).ti,ab.
  - 3 (anti-bacterial\* adj3 (resistan\* or susceptib\* or sensitiv\* or tolerance\*)).ti,ab.
  - 4 (anti-biotic\* adj3 (resistan\* or susceptib\* or sensitiv\* or tolerance\*)).ti,ab.
  - 5 (anti-microbial\* adj3 (resistan\* or susceptib\* or sensitiv\* or tolerance\*)).ti,ab.
  - 6 (antibacterial\* adj3 (resistan\* or susceptib\* or sensitiv\* or tolerance\*)).ti,ab.
  - 7 (antibiotic\* adj3 (resistan\* or susceptib\* or sensitiv\* or tolerance\*)).ti,ab.
  - 8 (antimicrobial\* adj3 (resistan\* or susceptib\* or sensitiv\* or tolerance\*)).ti,ab.
  - 9 (bacteria\* adj3 (resistan\* or susceptib\* or sensitiv\* or tolerance\*)).ti,ab.
  - 10 (("multi-drug" or drug) adj3 (resistan\* or susceptib\* or sensitiv\* or tolerance\*)).ti,ab.
  - 11 (resistan\* adj3 (trend\* or distribution\* or pattern\* or "community-level" or "population-level")).ti,ab.
  - 12 (resistan\* adj3 (detect\* or monitor\* or report\* or surveillan\*)).ti,ab.
  - 13 1 or 2 or 3 or 4 or 5 or 6 or 7 or 8 or 9 or 10 or 11 or 12

Annotation: AMR concept

- 14 exp waste water/
- 15 exp Environmental Monitoring/
- 16 Waste Disposal, Fluid/
- 17 Medical Waste Disposal/
- 18 (sewer\* or sewershed\* or watershed\* or "septic tank" or septage).ti,ab.
- 19 (wastewater\* or "waste-water\*" or sewage\* or influent\* or effluent\* or "untreated waste\*" or "raw waste\*" or "raw inflow\*" or "untreated inflow\*").ti,ab.
- 20 ("water-treatment" or "sewage treatment work\*" or STW\* or "wastewater treatment plant\*" or WWTP\* or "sewage treatment plant\*" or STP\* or WWTW\* or "wastewater treatment work\*" or "waste-water treatment plant\*" or "waste-water treatment work\*").ti,ab.
- 21 (water\* adj3 (sample\* or specimen\*)).ti,ab.
- 22 14 or 15 or 16 or 17 or 18 or 19 or 20 or 21

Annotation: wastewater concept

- 23 exp Bacteriological Techniques/
- 24 exp Population Surveillance/
- 25 whole genome sequencing/ or Metagenomics/ or high-throughput nucleotide sequencing/
- 26 sequence alignment/ or phylogeny/ or molecular epidemiology/
- 27 Water Microbiology/
- 28 Drug Prescriptions/
- 29 Tandem Mass Spectrometry/ or Chromatography, Liquid/
- 30 cross-sectional studies/ or Longitudinal Studies/
- 31 epidemiologic research design/ or epidemiological monitoring/
- 32 (longitudinal or "cross-sectional" or spatial or geospatial or quantitative evaluation).ti,ab.
- 33 ("antibiotic-residue\*" or "antibiotic-compound\*").ti,ab.
- 34 ((antibiotic or anti-biotic or antibacterial or anti-bacterial or antimicrobial or anti-microbial) adj3 (quantit\* or concentration\* or use\* or usage\*)).ti,ab.

35 ("disc-diffusion" or "selective media\*" or "antimicrobial susceptibility testing" or AST or "chromogenic" or PCR or "polymerase chain reaction" or "PFGE pulsed field gel electrophoresis" or "Multilocus sequence typing" or MLST).ti,ab.

36 (autosampler or "24-h composite").ti,ab.

37 chemical analys\*.ti,ab.

38 ("liquid chromatography" or "tandem mass spectrometry" or "LC-MS/MS" or "solid-phase extraction\*" or "liquid chromatography-tandem mass spectrometry").ti,ab.

39 (phylogen\* or "sequence analys\*" or "high-throughput nucleotide sequencing" or "DNA sequen\*" or "whole-genome sequenc\*" or WGS\* or "HiSeq" or "molecular-epidemiolog\*" or metagenom\* or "Hi-C").ti,ab.

40 (surveillance or "early warning\*" or epidemiolog\* or monitor\* or "public health").ti,ab.

41 ((antibiotic or anti-biotic or antibacterial or anti-bacterial or antimicrobial or anti-microbial) adj3 prescri\*).ti,ab.

42 ((associat\* or compar\*) adj3 (genotyp\* or prescri\* or "DNA sequen\*" or trend\* or distribution\*)).ti,ab.

43 (local\* adj3 (clinic\* or hospital\* or isolate\* or strain\* or communit\*)).ti,ab.

44 ((associat\* or compar\*) adj3 (time\* or location\* or geographic\* or region\* or communit\*)).ti,ab.

45 (relat\* adj3 (isolate\* or strain\* or cluster\*)).ti,ab.

46 ((epidemiolog\* or environment\* or sentinel or domestic or communit\* or population or "public health") adj3 (surveillance or monitor\* or report\* or detect\*)).ti,ab.

47 ("community-level" adj3 (trend\* or distribution\* or detect\* or monitor\* or report\* or surveillan\* or epidemiolog\*)).ti,ab.

48 ("population-level" adj3 (trend\* or distribution\* or detect\* or monitor\* or report\* or surveillan\* or epidemiolog\*)).ti,ab.

49 23 or 24 or 25 or 26 or 27 or 28 or 29 or 30 or 31 or 32 or 33 or 34 or 35 or 37 or 38 or 39 or 40 or 41 or 42 or 43 or 44 or 45 or 46 or 47 or 48

Annotation: methods / surveillance

50 exp Bacteria/

51 ("escherichia coli" or "e. coli" or "e.coli" or "e coli" or klebsiella\* or citrobacter\* or enterobacter\* or gram-negative\*).ti,ab.

52 50 or 51

Annotation: Bacteria concept

53 13 and 22 and 49 and 52

Annotation: Combined concepts

54 limit 53 to english language

\*\*\*\*\*

*Database: Embase 1974 to present*

*Search Strategy:*

-----

1 exp antibiotic resistance/

2 (AMR or ESBL or VRE or CPE or CRE or CRO or MDR or KPC).ti,ab.

3 (anti-bacterial\* adj3 (resistan\* or susceptib\* or sensitiv\* or tolerance\*)).ti,ab.

4 (anti-biotic\* adj3 (resistan\* or susceptib\* or sensitiv\* or tolerance\*)).ti,ab.

5 (anti-microbial\* adj3 (resistan\* or susceptib\* or sensitiv\* or tolerance\*)).ti,ab.

6 (antibacterial\* adj3 (resistan\* or susceptib\* or sensitiv\* or tolerance\*)).ti,ab.

7 (antibiotic\* adj3 (resistan\* or susceptib\* or sensitiv\* or tolerance\*)).ti,ab.

8 (antimicrobial\* adj3 (resistan\* or susceptib\* or sensitiv\* or tolerance\*)).ti,ab.

9 (bacteria\* adj3 (resistan\* or susceptib\* or sensitiv\* or tolerance\*)).ti,ab.

10 (("multi-drug" or drug) adj3 (resistan\* or susceptib\* or sensitiv\* or tolerance\*)).ti,ab.

11 (resistan\* adj3 (trend\* or distribution\* or pattern\* or "community-level" or "population-level")).ti,ab.

12 (resistan\* adj3 (detect\* or monitor\* or report\* or surveillan\*)).ti,ab.

13 1 or 2 or 3 or 4 or 5 or 6 or 7 or 8 or 9 or 10 or 11 or 12

14 exp waste water/

15 exp Environmental Monitoring/

16 Waste Disposal, Fluid/

17 Medical Waste Disposal/

18 (sewer\* or sewershed\* or watershed\* or "septic tank" or septage).ti,ab.

19 (wastewater\* or "waste-water\*" or sewage\* or influent\* or effluent\* or "untreated waste\*" or "raw waste\*" or "raw inflow\*" or "untreated inflow\*").ti,ab.

20 ("water-treatment" or "sewage treatment work\*" or STW\* or "wastewater treatment plant\*" or WWTP\* or "sewage treatment plant\*" or STP\* or WWTW\* or "wastewater treatment work\*" or "waste-water treatment plant\*" or "waste-water treatment work\*").ti,ab.

21 (water\* adj3 (sample\* or specimen\*)).ti,ab.

22 14 or 15 or 16 or 17 or 18 or 19 or 20 or 21

23 exp Bacteriological Techniques/

24 exp Population Surveillance/

25 whole genome sequencing/ or Metagenomics/ or high-throughput nucleotide sequencing/

26 sequence alignment/ or phylogeny/ or molecular epidemiology/

27 Water Microbiology/

28 Drug Prescriptions/

29 Tandem Mass Spectrometry/ or Chromatography, Liquid/

30 cross-sectional studies/ or Longitudinal Studies/

31 epidemiologic research design/ or epidemiological monitoring/

32 (longitudinal or "cross-sectional" or spatial or geospatial or quantitative evaluation).ti,ab.

33 ("antibiotic-residue\*" or "antibiotic-compound\*").ti,ab.

34 ((antibiotic or anti-biotic or antibacterial or anti-bacterial or antimicrobial or anti-microbial) adj3 (quantit\* or concentration\* or use\* or usage\*)).ti,ab.

35 ("disc-diffusion" or "selective media\*" or "antimicrobial susceptibility testing" or AST or "chromogenic" or PCR or "polymerase chain reaction" or "PFGE pulsed field gel electrophoresis" or "Multilocus sequence typing" or MLST).ti,ab.

36 (autosampler or "24-h composite").ti,ab.

37 chemical analys\*.ti,ab.

38 ("liquid chromatography" or "tandem mass spectrometry" or "LC-MS/MS" or "solid-phase extraction\*" or "liquid chromatography-tandem mass spectrometry").ti,ab.

39 (phylogen\* or "sequence analys\*" or "high-throughput nucleotide sequencing" or "DNA sequen\*" or "whole-genome sequenc\*" or WGS\* or "HiSeq" or "molecular-epidemiolog\*" or metagenom\* or "Hi-C").ti,ab.

40 (surveillance or "early warning\*" or epidemiolog\* or monitor\* or "public health").ti,ab.

41 ((antibiotic or anti-biotic or antibacterial or anti-bacterial or antimicrobial or anti-microbial) adj3 prescri\*).ti,ab.

42 ((associat\* or compar\*) adj3 (genotyp\* or prescri\* or "DNA sequen\*" or trend\* or distribution\*)).ti,ab.

43 (local\* adj3 (clinic\* or hospital\* or isolate\* or strain\* or communit\*)).ti,ab.

44 ((associat\* or compar\*) adj3 (time\* or location\* or geographic\* or region\* or communit\*)).ti,ab.

45 (relat\* adj3 (isolate\* or strain\* or cluster\*)).ti,ab.  
 46 ((epidemiolog\* or environment\* or sentinel or domestic or communit\* or population or "public health")  
 adj3 (surveillance or monitor\* or report\* or detect\*)).ti,ab.  
 47 ("community-level" adj3 (trend\* or distribution\* or detect\* or monitor\* or report\* or surveillan\* or  
 epidemiolog\*)).ti,ab.  
 48 ("population-level" adj3 (trend\* or distribution\* or detect\* or monitor\* or report\* or surveillan\* or  
 epidemiolog\*)).ti,ab.  
 49 23 or 24 or 25 or 26 or 27 or 28 or 29 or 30 or 31 or 32 or 33 or 34 or 35 or 37 or 38 or 39 or 40 or 41 or  
 42 or 43 or 44 or 45 or 46 or 47 or 48  
 50 exp Bacteria/  
 51 ("escherichia coli" or "e. coli" or "e.coli" or "e coli" or klebsiella\* or citrobacter\* or enterobacter\* or  
 gram-negative\*).ti,ab.  
 52 50 or 51 (1532136)  
 53 13 and 22 and 49 and 52  
 54 limit 53 to english language

\*\*\*\*\*

*Database: Global Health <1973 to 2019 Week 04>*

*Search Strategy:*

-----  
 1 exp drug resistance/  
 2 (AMR or ESBL or VRE or CPE or CRE or CRO or MDR or KPC).ti,ab.  
 3 (anti-bacterial\* adj3 (resistan\* or susceptib\* or sensitiv\* or tolerance\*)).ti,ab.  
 4 (anti-biotic\* adj3 (resistan\* or susceptib\* or sensitiv\* or tolerance\*)).ti,ab.  
 5 (anti-microbial\* adj3 (resistan\* or susceptib\* or sensitiv\* or tolerance\*)).ti,ab.  
 6 (antibacterial\* adj3 (resistan\* or susceptib\* or sensitiv\* or tolerance\*)).ti,ab.  
 7 (antibiotic\* adj3 (resistan\* or susceptib\* or sensitiv\* or tolerance\*)).ti,ab.  
 8 (antimicrobial\* adj3 (resistan\* or susceptib\* or sensitiv\* or tolerance\*)).ti,ab.  
 9 (bacteria\* adj3 (resistan\* or susceptib\* or sensitiv\* or tolerance\*)).ti,ab.  
 10 (("multi-drug" or drug) adj3 (resistan\* or susceptib\* or sensitiv\* or tolerance\*)).ti,ab.  
 11 (resistan\* adj3 (trend\* or distribution\* or pattern\* or "community-level" or "population-level")).ti,ab.  
 12 (resistan\* adj3 (detect\* or monitor\* or report\* or surveillan\*)).ti,ab.  
 13 1 or 2 or 3 or 4 or 5 or 6 or 7 or 8 or 9 or 10 or 11 or 12  
 14 exp waste water/  
 15 monitoring/  
 16 wastewater treatment/  
 17 exp wastewater treatment plants/  
 18 (sewer\* or sewershed\* or watershed\* or "septic tank" or septage).ti,ab.  
 19 (wastewater\* or "waste-water\*" or sewage\* or influent\* or effluent\* or "untreated waste\*" or "raw  
 waste\*" or "raw inflow\*" or "untreated inflow\*").ti,ab.  
 20 ("water-treatment" or "sewage treatment work\*" or STW\* or "wastewater treatment plant\*" or WWTP\*  
 or "sewage treatment plant\*" or STP\* or WWTW\* or "wastewater treatment work\*" or "waste-water  
 treatment plant\*" or "waste-water treatment work\*").ti,ab.  
 21 (water\* adj3 (sample\* or specimen\*)).ti,ab.  
 22 14 or 15 or 16 or 17 or 18 or 19 or 20 or 21

23 bacteriology/  
 24 exp surveillance/  
 25 exp DNA sequencing/  
 26 phylogeny/ or molecular epidemiology/  
 27 Water Microbiology/  
 28 prescriptions/  
 29 Mass Spectrometry/ or Liquid chromatography/  
 30 Longitudinal Studies/  
 31 disease prevalence/ or disease distribution/  
 32 (longitudinal or "cross-sectional" or spatial or geospatial or quantitative evaluation).ti,ab.  
 33 ("antibiotic-residue\*" or "antibiotic-compound\*").ti,ab.  
 34 ((antibiotic or anti-biotic or antibacterial or anti-bacterial or antimicrobial or anti-microbial) adj3  
 (quantit\* or concentration\* or use\* or usage\*)).ti,ab.  
 35 ("disc-diffusion" or "selective media\*" or "antimicrobial susceptibility testing" or AST or "chromogenic"  
 or PCR or "polymerase chain reaction" or "PFGE pulsed field gel electrophoresis" or "Multilocus sequence  
 typing" or MLST).ti,ab.  
 36 (autosampler or "24-h composite").ti,ab.  
 37 chemical analys\*.ti,ab.  
 38 ("liquid chromatography" or "tandem mass spectrometry" or "LC-MS/MS" or "solid-phase extraction\*" or "liquid chromatography-tandem mass spectrometry").ti,ab.  
 39 (phylogen\* or "sequence analys\*" or "high-throughput nucleotide sequencing" or "DNA sequen\*" or  
 "whole-genome sequenc\*" or WGS\* or "HiSeq" or "molecular-epidemiolog\*" or metagenom\* or "Hi-C").ti,ab.  
 40 (surveillance or "early warning\*" or epidemiolog\* or monitor\* or "public health").ti,ab.  
 41 ((antibiotic or anti-biotic or antibacterial or anti-bacterial or antimicrobial or anti-microbial) adj3  
 prescri\*).ti,ab.  
 42 ((associat\* or compar\*) adj3 (genotyp\* or prescri\* or "DNA sequen\*" or trend\* or distribution\*)).ti,ab.  
 43 (local\* adj3 (clinic\* or hospital\* or isolate\* or strain\* or communit\*)).ti,ab.  
 44 ((associat\* or compar\*) adj3 (time\* or location\* or geographic\* or region\* or communit\*)).ti,ab.  
 45 (relat\* adj3 (isolate\* or strain\* or cluster\*)).ti,ab.  
 46 ((epidemiolog\* or environment\* or sentinel or domestic or communit\* or population or "public health")  
 adj3 (surveillance or monitor\* or report\* or detect\*)).ti,ab.  
 47 ("community-level" adj3 (trend\* or distribution\* or detect\* or monitor\* or report\* or surveillan\* or  
 epidemiolog\*)).ti,ab.  
 48 ("population-level" adj3 (trend\* or distribution\* or detect\* or monitor\* or report\* or surveillan\* or  
 epidemiolog\*)).ti,ab.  
 49 23 or 24 or 25 or 26 or 27 or 28 or 29 or 30 or 31 or 32 or 33 or 34 or 35 or 37 or 38 or 39 or 40 or 41 or  
 42 or 43 or 44 or 45 or 46 or 47 or 48  
 50 exp Bacteria/  
 51 ("escherichia coli" or "e. coli" or "e.coli" or "e coli" or klebsiella\* or citrobacter\* or enterobacter\* or  
 gram-negative\*).ti,ab.  
 52 50 or 51  
 53 13 and 22 and 49 and 52  
 54 limit 53 to english language

\*\*\*\*\*

- 
- 1 exp drug resistance/ (54946)
  - 2 (AMR or ESBL or VRE or CPE or CRE or CRO or MDR or KPC).ti,ab.
  - 3 (anti-bacterial\* adj3 (resistan\* or susceptib\* or sensitiv\* or tolerance\*)).ti,ab.
  - 4 (anti-biotic\* adj3 (resistan\* or susceptib\* or sensitiv\* or tolerance\*)).ti,ab.
  - 5 (anti-microbial\* adj3 (resistan\* or susceptib\* or sensitiv\* or tolerance\*)).ti,ab.
  - 6 (antibacterial\* adj3 (resistan\* or susceptib\* or sensitiv\* or tolerance\*)).ti,ab.
  - 7 (antibiotic\* adj3 (resistan\* or susceptib\* or sensitiv\* or tolerance\*)).ti,ab.
  - 8 (antimicrobial\* adj3 (resistan\* or susceptib\* or sensitiv\* or tolerance\*)).ti,ab.
  - 9 (bacteria\* adj3 (resistan\* or susceptib\* or sensitiv\* or tolerance\*)).ti,ab.
  - 10 (("multi-drug" or drug) adj3 (resistan\* or susceptib\* or sensitiv\* or tolerance\*)).ti,ab.
  - 11 (resistan\* adj3 (trend\* or distribution\* or pattern\* or "community-level" or "population-level")).ti,ab.
  - 12 (resistan\* adj3 (detect\* or monitor\* or report\* or surveillan\*)).ti,ab.
  - 13 1 or 2 or 3 or 4 or 5 or 6 or 7 or 8 or 9 or 10 or 11 or 12
  - 14 exp waste water/
  - 15 monitoring/
  - 16 wastewater treatment/
  - 17 exp wastewater treatment plants/
  - 18 (sewer\* or sewershed\* or watershed\* or "septic tank" or septage).ti,ab.
  - 19 (wastewater\* or "waste-water\*" or sewage\* or influent\* or effluent\* or "untreated waste\*" or "raw waste\*" or "raw inflow\*" or "untreated inflow\*").ti,ab.
  - 20 ("water-treatment" or "sewage treatment work\*" or STW\* or "wastewater treatment plant\*" or WWTP\* or "sewage treatment plant\*" or STP\* or WWTW\* or "wastewater treatment work\*" or "waste-water treatment plant\*" or "waste-water treatment work\*").ti,ab.
  - 21 (water\* adj3 (sample\* or specimen\*)).ti,ab.
  - 22 14 or 15 or 16 or 17 or 18 or 19 or 20 or 21
  - 23 bacteriology/
  - 24 exp surveillance/
  - 25 exp DNA sequencing/
  - 26 phylogeny/ or molecular epidemiology/
  - 27 Water Microbiology/
  - 28 prescriptions/
  - 29 Mass Spectrometry/ or Liquid chromatography/
  - 30 Longitudinal Studies/
  - 31 disease prevalence/ or disease distribution/
  - 32 (longitudinal or "cross-sectional" or spatial or geospatial or quantitative evaluation).ti,ab.
  - 33 ("antibiotic-residue\*" or "antibiotic-compound\*").ti,ab.
  - 34 ((antibiotic or anti-biotic or antibacterial or anti-bacterial or antimicrobial or anti-microbial) adj3 (quantit\* or concentration\* or use\* or usage\*)).ti,ab.
  - 35 ("disc-diffusion" or "selective media\*" or "antimicrobial susceptibility testing" or AST or "chromogenic" or PCR or "polymerase chain reaction" or "PFGE pulsed field gel electrophoresis" or "Multilocus sequence typing" or MLST).ti,ab.
  - 36 (autosampler or "24-h composite").ti,ab.
  - 37 chemical analys\*.ti,ab.

38 ("liquid chromatography" or "tandem mass spectrometry" or "LC-MS/MS" or "solid-phase extraction\*" or "liquid chromatography-tandem mass spectrometry").ti,ab.

39 (phylogen\* or "sequence analys\*" or "high-throughput nucleotide sequencing" or "DNA sequen\*" or "whole-genome sequenc\*" or WGS\* or "HiSeq" or "molecular-epidemiolog\*" or metagenom\* or "Hi-C").ti,ab.

40 (surveillance or "early warning\*" or epidemiolog\* or monitor\* or "public health").ti,ab.

41 ((antibiotic or anti-biotic or antibacterial or anti-bacterial or antimicrobial or anti-microbial) adj3 prescri\*).ti,ab.

42 ((associat\* or compar\*) adj3 (genotyp\* or prescri\* or "DNA sequen\*" or trend\* or distribution\*)).ti,ab.

43 (local\* adj3 (clinic\* or hospital\* or isolate\* or strain\* or communit\*)).ti,ab.

44 ((associat\* or compar\*) adj3 (time\* or location\* or geographic\* or region\* or communit\*)).ti,ab.

45 (relat\* adj3 (isolate\* or strain\* or cluster\*)).ti,ab.

46 ((epidemiolog\* or environment\* or sentinel or domestic or communit\* or population or "public health") adj3 (surveillance or monitor\* or report\* or detect\*)).ti,ab.

47 ("community-level" adj3 (trend\* or distribution\* or detect\* or monitor\* or report\* or surveillan\* or epidemiolog\*)).ti,ab.

48 ("population-level" adj3 (trend\* or distribution\* or detect\* or monitor\* or report\* or surveillan\* or epidemiolog\*)).ti,ab.

49 23 or 24 or 25 or 26 or 27 or 28 or 29 or 30 or 31 or 32 or 33 or 34 or 35 or 37 or 38 or 39 or 40 or 41 or 42 or 43 or 44 or 45 or 46 or 47 or 48

50 exp Bacteria/

51 ("escherichia coli" or "e. coli" or "e.coli" or "e coli" or klebsiella\* or citrobacter\* or enterobacter\* or gram-negative\*).ti,ab.

52 50 or 51

53 13 and 22 and 49 and 52

54 limit 53 to english language

\*\*\*\*\*

*Database: Scopus*

*Search Strategy:*

-----

(( (TITLE-ABS-KEY (amr OR esbl OR vre OR cpe OR cre OR cro OR mdr OR kpc)) OR (TITLE-ABS-KEY (anti-bacterial\* W/3 (resistan\* OR susceptib\* OR sensitiv\* OR tolerance\*))) OR (TITLE-ABS-KEY (anti-biotic\* W/3 (resistan\* OR susceptib\* OR sensitiv\* OR tolerance\*))) OR (TITLE-ABS-KEY (anti-microbial\* W/3 (resistan\* OR susceptib\* OR sensitiv\* OR tolerance\*))) OR (TITLE-ABS-KEY (antibacterial\* W/3 (resistan\* OR susceptib\* OR sensitiv\* OR tolerance\*))) OR (TITLE-ABS-KEY (antibiotic\* W/3 (resistan\* OR susceptib\* OR sensitiv\* OR tolerance\*))) OR (TITLE-ABS-KEY (antimicrobial\* W/3 (resistan\* OR susceptib\* OR sensitiv\* OR tolerance\*))) OR (TITLE-ABS-KEY (bacteria\* W/3 (resistan\* OR susceptib\* OR sensitiv\* OR tolerance\*))) OR (TITLE-ABS-KEY ("multi-drug" OR drug) W/3 (resistan\* OR susceptib\* OR sensitiv\* OR tolerance\*))) OR (TITLE-ABS-KEY (resistan\* W/3 (trend\* OR distribution\* OR pattern\* OR "community-level" OR "population-level")))) OR (TITLE-ABS-KEY (resistan\* W/3 (detect\* OR monitor\* OR report\* OR surveillan\*))) AND ((TITLE-ABS-KEY (sewer\* OR sewershed\* OR watershed\* OR "septic tank" OR septage OR wastewater\* OR "waste-water\*" OR sewage\* OR influent\* OR effluent\* OR "untreated waste\*" OR "raw waste\*" OR "raw inflow\*" OR "untreated inflow\*" OR "water-treatment")))

OR ( TITLE-ABS-KEY ( "sewage treatment work\*" OR stw\* OR "wastewater treatment plant\*" OR wwtp\* OR "sewage treatment plant\*" OR stp\* OR wwtw\* OR "wastewater treatment work\*" OR "waste-water treatment plant\*" OR "waste-water treatment work\*" ) ) OR ( TITLE-ABS-KEY ( water\* W/3 ( sample\* OR specimen\* ) ) ) ) AND ( ( TITLE-ABS-KEY ( longitudinal OR "cross-sectional" OR spatial OR geospatial OR quantitative AND evaluation OR "antibiotic-residue\*" OR "antibiotic-compound\*" ) ) OR ( TITLE-ABS-KEY ( ( ( antibiotic OR anti-biotic OR antibacterial OR anti-bacterial OR antimicrobial OR anti-microbial ) W/3 ( quantit\* OR concentration\* OR use\* OR usage\* ) ) ) ) OR ( TITLE-ABS-KEY ( "disc-diffusion" OR "selective media\*" OR "antimicrobial susceptibility testing" OR ast OR "chromogenic" OR pcr OR "polymerase chain reaction" OR "PFGE pulsed field gel electrophoresis" OR "Multilocus sequence typing" OR mlst ) ) OR ( TITLE-ABS-KEY ( autosampler OR "24-h composite" OR "chemical analys\*" OR "liquid chromatography" OR "tandem mass spectrometry" OR "LC-MS/MS" OR "solid-phase extraction\*" OR "liquid chromatography-tandem mass spectrometry" ) ) OR ( TITLE-ABS-KEY ( phylogen\* OR "sequence analys\*" OR "high-throughput nucleotide sequencing" OR "DNA sequen\*" OR "whole-genome sequenc\*" OR wgs\* OR "HiSeq" OR "molecular-epidemiolog\*" OR metagenom\* OR "Hi-C" ) ) OR ( TITLE-ABS-KEY ( surveillance OR "early warning\*" OR epidemiolog\* OR monitor\* OR "public health" ) ) OR ( TITLE-ABS-KEY ( ( ( antibiotic OR anti-biotic OR antibacterial OR anti-bacterial OR antimicrobial OR anti-microbial ) W/3 prescri\* ) ) ) OR ( TITLE-ABS-KEY ( ( ( associat\* OR compar\* ) W/3 ( genotyp\* OR prescri\* OR "DNA sequen\*" OR trend\* OR distribution\* ) ) ) ) OR ( TITLE-ABS-KEY ( ( local\* W/3 ( clinic\* OR hospital\* OR isolate\* OR strain\* OR communit\* ) ) ) ) OR ( TITLE-ABS-KEY ( ( ( associat\* OR compar\* ) W/3 ( time\* OR location\* OR geographic\* OR region\* OR communit\* ) ) ) ) OR ( TITLE-ABS-KEY ( ( relat\* W/3 ( isolate\* OR strain\* OR cluster\* ) ) ) ) OR ( TITLE-ABS-KEY ( ( ( epidemiolog\* OR environment\* OR sentinel OR domestic OR communit\* OR population OR "public health" ) W/3 ( surveillance OR monitor\* OR report\* OR detect\* ) ) ) ) OR ( TITLE-ABS-KEY ( ( "community-level" W/3 ( trend\* OR distribution\* OR detect\* OR monitor\* OR report\* OR surveillan\* OR epidemiolog\* ) ) ) ) OR ( TITLE-ABS-KEY ( ( "population-level" W/3 ( trend\* OR distribution\* OR detect\* OR monitor\* OR report\* OR surveillan\* OR epidemiolog\* ) ) ) ) ) AND ( TITLE-ABS-KEY ( ( bacteri\* OR gram-positive\* OR "escherichia coli" OR "e. coli" OR "e.coli" OR "e coli" OR klebsiella\* OR citrobacter\* OR enterobacter\* OR gram-negative\* ) ) ) AND ( LIMIT-TO ( LANGUAGE , "English" ) )

\*\*\*\*\*

*Database: Web of Science*

*Search Strategy:*

(( TITLE-ABS-KEY ( amr OR esbl OR vre OR cpe OR cre OR cro OR mdx OR kpc ) ) OR ( TITLE-ABS-KEY ( anti-bacterial\* near/3 ( resistan\* OR susceptib\* OR sensitiv\* OR tolerance\* ) ) ) OR ( TITLE-ABS-KEY ( anti-biotic\* near/3 ( resistan\* OR susceptib\* OR sensitiv\* OR tolerance\* ) ) ) OR ( TITLE-ABS-KEY ( anti-microbial\* near/3 ( resistan\* OR susceptib\* OR sensitiv\* OR tolerance\* ) ) ) OR ( TITLE-ABS-KEY ( antibacterial\* near/3 ( resistan\* OR susceptib\* OR sensitiv\* OR tolerance\* ) ) ) OR ( TITLE-ABS-KEY ( antibiotic\* near/3 ( resistan\* OR susceptib\* OR sensitiv\* OR tolerance\* ) ) ) OR ( TITLE-ABS-KEY ( antimicrobial\* near/3 ( resistan\* OR susceptib\* OR sensitiv\* OR tolerance\* ) ) ) OR ( TITLE-ABS-KEY ( bacteria\* near/3 ( resistan\* OR susceptib\* OR sensitiv\* OR tolerance\* ) ) ) OR ( TITLE-ABS-KEY ( "multi-drug" OR drug ) near/3 ( resistan\* OR susceptib\* OR sensitiv\* OR tolerance\* ) ) ) OR ( TITLE-ABS-KEY ( resistan\* near/3 ( trend\* OR distribution\* OR pattern\* OR



"community-level" OR "population-level" ) ) ) OR ( TITLE-ABS-KEY ( resistan\* near/3 ( detect\* OR monitor\* OR report\* OR surveillan\* ) ) ) ) AND ( ( TITLE-ABS-KEY ( sewer\* OR sewershed\* OR watershed\* OR "septic tank" OR septage OR wastewater\* OR "waste-water\*" OR sewage\* OR influent\* OR effluent\* OR "untreated waste\*" OR "raw waste\*" OR "raw inflow\*" OR "untreated inflow\*" OR "water-treatment" ) ) OR ( TITLE-ABS-KEY ( "sewage treatment work\*" OR stw\* OR "wastewater treatment plant\*" OR wwtp\* OR "sewage treatment plant\*" OR stp\* OR wwtp\* OR "wastewater treatment work\*" OR "waste-water treatment plant\*" OR "waste-water treatment work\*" ) ) OR ( TITLE-ABS-KEY ( water\* near/3 ( sample\* OR specimen\* ) ) ) ) AND ( ( TITLE-ABS-KEY ( longitudinal OR "cross-sectional" OR spatial OR geospatial OR quantitative AND evaluation OR "antibiotic-residue\*" OR "antibiotic-compound\*" ) ) OR ( TITLE-ABS-KEY ( ( ( antibiotic OR anti-biotic OR antibacterial OR anti-bacterial OR antimicrobial OR anti-microbial ) near/3 ( quantit\* OR concentration\* OR use\* OR usage\* ) ) ) ) OR ( TITLE-ABS-KEY ( "disc-diffusion" OR "selective media\*" OR "antimicrobial susceptibility testing" OR ast OR "chromogenic" OR pcr OR "polymerase chain reaction" OR "PFGE pulsed field gel electrophoresis" OR "Multilocus sequence typing" OR mlst ) ) OR ( TITLE-ABS-KEY ( autosampler OR "24-h composite" OR "chemical analys\*" OR "liquid chromatography" OR "tandem mass spectrometry" OR "LC-MS/MS" OR "solid-phase extraction\*" OR "liquid chromatography-tandem mass spectrometry" ) ) OR ( TITLE-ABS-KEY ( phylogen\* OR "sequence analys\*" OR "high-throughput nucleotide sequencing" OR "DNA sequen\*" OR "whole-genome sequenc\*" OR wgs\* OR "HiSeq" OR "molecular-epidemiolog\*" OR metagenom\* OR "Hi-C" ) ) OR ( TITLE-ABS-KEY ( surveillance OR "early warning\*" OR epidemiolog\* OR monitor\* OR "public health" ) ) OR ( TITLE-ABS-KEY ( ( ( antibiotic OR anti-biotic OR antibacterial OR anti-bacterial OR antimicrobial OR anti-microbial ) near/3 prescri\* ) ) ) OR ( TITLE-ABS-KEY ( ( ( associat\* OR compar\* ) near/3 ( genotyp\* OR prescri\* OR "DNA sequen\*" OR trend\* OR distribution\* ) ) ) ) OR ( TITLE-ABS-KEY ( ( local\* near/3 ( clinic\* OR hospital\* OR isolate\* OR strain\* OR communit\* ) ) ) ) OR ( TITLE-ABS-KEY ( ( ( associat\* OR compar\* ) near/3 ( time\* OR location\* OR geographic\* OR region\* OR communit\* ) ) ) ) OR ( TITLE-ABS-KEY ( ( relat\* near/3 ( isolate\* OR strain\* OR cluster\* ) ) ) ) OR ( TITLE-ABS-KEY ( ( ( epidemiolog\* OR environment\* OR sentinel OR domestic OR communit\* OR population OR "public health" ) near/3 ( surveillance OR monitor\* OR report\* OR detect\* ) ) ) ) OR ( TITLE-ABS-KEY ( ( "community-level" near/3 ( trend\* OR distribution\* OR detect\* OR monitor\* OR report\* OR surveillan\* OR epidemiolog\* ) ) ) ) OR ( TITLE-ABS-KEY ( ( "population-level" near/3 ( trend\* OR distribution\* OR detect\* OR monitor\* OR report\* OR surveillan\* OR epidemiolog\* ) ) ) ) ) AND ( TITLE-ABS-KEY ( ( bacteri\* OR gram-positive\* OR "escherichia coli" OR "e. coli" OR "e.coli" OR "e coli" OR klebsiella\* OR citrobacter\* OR enterobacter\* OR gram-negative\* ) ) ) AND ( LIMIT-TO ( LANGUAGE , "English" ) )

\*\*\*\*\*
