# Supplementary material for: Wastewater Surveillance of Antimicrobial Resistance in Human Populations: A Systematic Review
Source: Preprints.org preprint supplement (doi:10.20944/preprints202010.0267.v1), 2020-10-13
Supplement: Supplementary file 1 [file supplementary]

## Sheet: Sheet1
Paper title	Citation	Bias	Author's judgement (high, low, unclear)	Support for judgement	Overall bias
High Frequency of Vancomycin-Resistant Enterococci in Sewage and Fecal Samples of Healthy Carriers	Haghi et al. 2019	Selection bias: differences introduced across sampled sites by use of significantly different wastewater sampling method/strategy	high	Wastewater was "collected randomly" between sites with no standard sampling inverval	High
High Frequency of Vancomycin-Resistant Enterococci in Sewage and Fecal Samples of Healthy Carriers	Haghi et al. 2019	Performance bias: differences introduced between sites and across comparison groups by the use of different processing/AMR detection approaches	low	All samples (sewage and faecal) were cultured with the same methods. All isolates were also tested with the same methods	High
High Frequency of Vancomycin-Resistant Enterococci in Sewage and Fecal Samples of Healthy Carriers	Haghi et al. 2019	Attrition bias: differences introduced by incomplete outcome data where data fields may be missing across comparison groups and longitudinal studies in particular may be missing timepoints due to logistical reasons	unclear	Longitudinal sampling interval not reported so risk of missing timepoints unclear	High
High Frequency of Vancomycin-Resistant Enterococci in Sewage and Fecal Samples of Healthy Carriers	Haghi et al. 2019	Reporting bias: differences arising from selective reporting where outcomes may be measured but not reported or disproportionately reported compared to other outcomes	unclear	unclear	High
High Frequency of Vancomycin-Resistant Enterococci in Sewage and Fecal Samples of Healthy Carriers	Haghi et al. 2019	Other bias (confounding): confounding in reference to the uncertain presence of AMR/AMR-influencing sources which could have impacted study outcomes.	high	Wastewater only described as "urban sewage water" with no other details - Unknown if sourced from STW or sewers, and if unique sewer inputs are present	High
Antibiotic resistance in European wastewater treatment plants mirrors the pattern of clinical antibiotic resistance prevalence	Pärnänen et al. 2019	Selection bias: differences introduced across sampled sites by use of significantly different wastewater sampling method/strategy	low	Use of same sampling method and sample processing across sites - "All participants followed a common protocol for sampling, sample processing, and DNA extraction."	Unclear
Antibiotic resistance in European wastewater treatment plants mirrors the pattern of clinical antibiotic resistance prevalence	Pärnänen et al. 2019	Performance bias: differences introduced between sites and across comparison groups by the use of different processing/AMR detection approaches	low	Same processing/AMR detection methods used on samples across sites. Comparison groups appropriately matched "the information from the two sources was matched in terms of target antibiotics"	Unclear
Antibiotic resistance in European wastewater treatment plants mirrors the pattern of clinical antibiotic resistance prevalence	Pärnänen et al. 2019	Attrition bias: differences introduced by incomplete outcome data where data fields may be missing across comparison groups and longitudinal studies in particular may be missing timepoints due to logistical reasons	high	Four sites missing timepoint samples (2 sites in Portugal*, 2 sites in Ireland**). "*Since PT1 suffered an overflow during winter 2016 and was not operating in March 2016, samples were collected in another UWTP in the same region (PT3). **The analysis of wastewater influent was not possible in Ireland due to restrictions on wastewater sample collection."	Unclear
Antibiotic resistance in European wastewater treatment plants mirrors the pattern of clinical antibiotic resistance prevalence	Pärnänen et al. 2019	Reporting bias: differences arising from selective reporting where outcomes may be measured but not reported or disproportionately reported compared to other outcomes	unclear	unclear	Unclear
Antibiotic resistance in European wastewater treatment plants mirrors the pattern of clinical antibiotic resistance prevalence	Pärnänen et al. 2019	Other bias (confounding): confounding in reference to the uncertain presence of AMR/AMR-influencing sources which could have impacted study outcomes.	low	Hospital sewer inputs reported (number of hospitals and size by beds)	Unclear
Population-level surveillance of antibiotic resistance in Escherichia coli through sewage analysis	Hutinel et al. 2019	Selection bias: differences introduced across sampled sites by use of significantly different wastewater sampling method/strategy	low	Sampling methods and interval are the same across all STWs (24H flow-proportional), and method similar for hospital effluent (24H composite)	Unclear
Population-level surveillance of antibiotic resistance in Escherichia coli through sewage analysis	Hutinel et al. 2019	Performance bias: differences introduced between sites and across comparison groups by the use of different processing/AMR detection approaches	low	Different AMR detection methods were used between comparison groups (disk diffusion for clinical, broth screening for sewage) but comparability of methods was evaluated in the same study to show both methods in agreement. Panel of antibiotics for broth screening was chosen to match clinical testing "The panel of antibiotics tested was chosen to match the tests routinely performed on E. coli isola…	Unclear
Population-level surveillance of antibiotic resistance in Escherichia coli through sewage analysis	Hutinel et al. 2019	Attrition bias: differences introduced by incomplete outcome data where data fields may be missing across comparison groups and longitudinal studies in particular may be missing timepoints due to logistical reasons	low	No timepoints missed or data missing between sites	Unclear
Population-level surveillance of antibiotic resistance in Escherichia coli through sewage analysis	Hutinel et al. 2019	Reporting bias: differences arising from selective reporting where outcomes may be measured but not reported or disproportionately reported compared to other outcomes	unclear	unclear	Unclear
Population-level surveillance of antibiotic resistance in Escherichia coli through sewage analysis	Hutinel et al. 2019	Other bias (confounding): confounding in reference to the uncertain presence of AMR/AMR-influencing sources which could have impacted study outcomes.	unclear	Sewer inputs are not explicitly reported but hospital is described to be within area of STW and that primary care patients were served by sampled STWs - no mention of other inputs	Unclear
Comparison of Extended-Spectrum-β-Lactamase (ESBL) Carrying Escherichia Coli From Sewage Sludge and Human Urinary Tract Infection	Zarfel et al. 2013	Selection bias: differences introduced across sampled sites by use of significantly different wastewater sampling method/strategy	low	Sampling method (24H flow-proportional) kept consistent for each STW visit	Unclear
Comparison of Extended-Spectrum-β-Lactamase (ESBL) Carrying Escherichia Coli From Sewage Sludge and Human Urinary Tract Infection	Zarfel et al. 2013	Performance bias: differences introduced between sites and across comparison groups by the use of different processing/AMR detection approaches	low	Same processing/AMR detection methods used on samples across comparison groups.	Unclear
Comparison of Extended-Spectrum-β-Lactamase (ESBL) Carrying Escherichia Coli From Sewage Sludge and Human Urinary Tract Infection	Zarfel et al. 2013	Attrition bias: differences introduced by incomplete outcome data where data fields may be missing across comparison groups and longitudinal studies in particular may be missing timepoints due to logistical reasons	low	No timepoints missed or data missing between sites	Unclear
Comparison of Extended-Spectrum-β-Lactamase (ESBL) Carrying Escherichia Coli From Sewage Sludge and Human Urinary Tract Infection	Zarfel et al. 2013	Reporting bias: differences arising from selective reporting where outcomes may be measured but not reported or disproportionately reported compared to other outcomes	unclear	unclear	Unclear
Comparison of Extended-Spectrum-β-Lactamase (ESBL) Carrying Escherichia Coli From Sewage Sludge and Human Urinary Tract Infection	Zarfel et al. 2013	Other bias (confounding): confounding in reference to the uncertain presence of AMR/AMR-influencing sources which could have impacted study outcomes.	unclear	Sampled large STWs serving large catchments with populations over 100,000 but sewer inputs not reported other than reporting clinical isolates originate from "from people living in the catchment area of the wastewater plant"	Unclear
Antibiotic resistance genes in bacterial and bacteriophage fractions of Tunisian and Spanish wastewaters as markers to compare the antibiotic resistance patterns in each population	Colomer-Lluch et al. 2014	Selection bias: differences introduced across sampled sites by use of significantly different wastewater sampling method/strategy	Unclear	Shared sampling method reported (grab) but sampling strategy not reported in details - "Samples from Tunisia comprise incoming raw sewage to WWTPs sampled in three locations between 2011 and 2014 (and) the area of Barcelona between 2011 and 2014"	Unclear
Antibiotic resistance genes in bacterial and bacteriophage fractions of Tunisian and Spanish wastewaters as markers to compare the antibiotic resistance patterns in each population	Colomer-Lluch et al. 2014	Performance bias: differences introduced between sites and across comparison groups by the use of different processing/AMR detection approaches	low	Same processing/AMR detection methods used across sites	Unclear
Antibiotic resistance genes in bacterial and bacteriophage fractions of Tunisian and Spanish wastewaters as markers to compare the antibiotic resistance patterns in each population	Colomer-Lluch et al. 2014	Attrition bias: differences introduced by incomplete outcome data where data fields may be missing across comparison groups and longitudinal studies in particular may be missing timepoints due to logistical reasons	unclear	Longitudinal sampling interval not reported so risk of missing timepoints unclear	Unclear
Antibiotic resistance genes in bacterial and bacteriophage fractions of Tunisian and Spanish wastewaters as markers to compare the antibiotic resistance patterns in each population	Colomer-Lluch et al. 2014	Reporting bias: differences arising from selective reporting where outcomes may be measured but not reported or disproportionately reported compared to other outcomes	high	Total number of wastewater samples (and those contributing to analyses) originating from each comparison group not reported - "In total, 26 samples were used for total DNA extraction ".	Unclear
Antibiotic resistance genes in bacterial and bacteriophage fractions of Tunisian and Spanish wastewaters as markers to compare the antibiotic resistance patterns in each population	Colomer-Lluch et al. 2014	Other bias (confounding): confounding in reference to the uncertain presence of AMR/AMR-influencing sources which could have impacted study outcomes.	low	Defined the presence of domestic-only and tourist facility sewer inputs	Unclear
Biochemical Fingerprinting of Methicillin-Resistant Staphylococcus aureus Isolated From Sewage and Hospital in Iran	Rahimi et al. 2014	Selection bias: differences introduced across sampled sites by use of significantly different wastewater sampling method/strategy	low	No change in sampling method due to one site and one visit	Unclear
Biochemical Fingerprinting of Methicillin-Resistant Staphylococcus aureus Isolated From Sewage and Hospital in Iran	Rahimi et al. 2014	Performance bias: differences introduced between sites and across comparison groups by the use of different processing/AMR detection approaches	low	Same processing/AMR detection methods used across comparison groups - "all the S. aureus isolates were examined for susceptibility to…".	Unclear
Biochemical Fingerprinting of Methicillin-Resistant Staphylococcus aureus Isolated From Sewage and Hospital in Iran	Rahimi et al. 2014	Attrition bias: differences introduced by incomplete outcome data where data fields may be missing across comparison groups and longitudinal studies in particular may be missing timepoints due to logistical reasons	low	No data missing across compartments	Unclear
Biochemical Fingerprinting of Methicillin-Resistant Staphylococcus aureus Isolated From Sewage and Hospital in Iran	Rahimi et al. 2014	Reporting bias: differences arising from selective reporting where outcomes may be measured but not reported or disproportionately reported compared to other outcomes	unclear	unclear	Unclear
Biochemical Fingerprinting of Methicillin-Resistant Staphylococcus aureus Isolated From Sewage and Hospital in Iran	Rahimi et al. 2014	Other bias (confounding): confounding in reference to the uncertain presence of AMR/AMR-influencing sources which could have impacted study outcomes.	high	STW only described as "In 2010, an urban STP located in the west of Tehran was selected for collecting the sewage samples." without defining STW sampling point or sewer inputs, including if the clinical samples "collected from patients in a referral hospital in Tehran during 2010" were within STW catchment.	Unclear
Characterisation, dissemination and persistence of gentamicin resistant Escherichia coli from a Danish university hospital to the waste water environment.	Jakobsen et al. 2008	Selection bias: differences introduced across sampled sites by use of significantly different wastewater sampling method/strategy	high	Different sampling methodology between STWs (24H flow-proportional), hospital effluent (flow-adjusted composite) and domestic outlet (limited-composite)	Unclear
Characterisation, dissemination and persistence of gentamicin resistant Escherichia coli from a Danish university hospital to the waste water environment.	Jakobsen et al. 2008	Performance bias: differences introduced between sites and across comparison groups by the use of different processing/AMR detection approaches	low	All samples from across sites/comparison groups processed and treated the same.	Unclear
Characterisation, dissemination and persistence of gentamicin resistant Escherichia coli from a Danish university hospital to the waste water environment.	Jakobsen et al. 2008	Attrition bias: differences introduced by incomplete outcome data where data fields may be missing across comparison groups and longitudinal studies in particular may be missing timepoints due to logistical reasons	low	No data missing across sites/compartments	Unclear
Characterisation, dissemination and persistence of gentamicin resistant Escherichia coli from a Danish university hospital to the waste water environment.	Jakobsen et al. 2008	Reporting bias: differences arising from selective reporting where outcomes may be measured but not reported or disproportionately reported compared to other outcomes	unclear	unclear	Unclear
Characterisation, dissemination and persistence of gentamicin resistant Escherichia coli from a Danish university hospital to the waste water environment.	Jakobsen et al. 2008	Other bias (confounding): confounding in reference to the uncertain presence of AMR/AMR-influencing sources which could have impacted study outcomes.	low	Sewer inputs reported (hospital, industry and domestic-only) and considered during analyses "To be able to compare the prevalence of GENRE. coli isolates from hospital related and residential WW, samples from a WW outlet in a residential area in Copenhagen County with no known source of GEN or GENRE. coli was collected in the same period of time. "	Unclear
Clonal groups of high-level gentamicin-resistant Enterococcus faecium isolated from municipal wastewater and clinical samples in Tehran, Iran	Saifi et al 2009	Selection bias: differences introduced across sampled sites by use of significantly different wastewater sampling method/strategy	unclear	Samplng method and strategy not reported - " enterococci isolates were collected from three STP"	Unclear
Clonal groups of high-level gentamicin-resistant Enterococcus faecium isolated from municipal wastewater and clinical samples in Tehran, Iran	Saifi et al 2009	Performance bias: differences introduced between sites and across comparison groups by the use of different processing/AMR detection approaches	low	Same processing methods used across sites - "To obtain the HLGR enterococci from wastewater, the raw sewage samples were..." and same AMR detection methods across sites/clinical comparison group "Resistance to antimicrobial agents was determined by disc diffusion and minimum inhibitory concentration (MIC) with microdilution method in accordance with the standard protocol (National Committee for C…	Unclear
Clonal groups of high-level gentamicin-resistant Enterococcus faecium isolated from municipal wastewater and clinical samples in Tehran, Iran	Saifi et al 2009	Attrition bias: differences introduced by incomplete outcome data where data fields may be missing across comparison groups and longitudinal studies in particular may be missing timepoints due to logistical reasons	unclear	Longitudinal sampling interval not reported so possibility of missing timepoints unclear	Unclear
Clonal groups of high-level gentamicin-resistant Enterococcus faecium isolated from municipal wastewater and clinical samples in Tehran, Iran	Saifi et al 2009	Reporting bias: differences arising from selective reporting where outcomes may be measured but not reported or disproportionately reported compared to other outcomes	unclear	unclear	Unclear
Clonal groups of high-level gentamicin-resistant Enterococcus faecium isolated from municipal wastewater and clinical samples in Tehran, Iran	Saifi et al 2009	Other bias (confounding): confounding in reference to the uncertain presence of AMR/AMR-influencing sources which could have impacted study outcomes.	high	Wastewater described as "collected from three STP located in different parts of Tehran" with no other details reported - no indication of if clinical comparison group isolates originate from STW catchments or sampling point	Unclear
Surveillance of antimicrobial resistance among Escherichia coli in wastewater in Stockholm during 1 year: does it reflect the resistance trends in the society?	Kwak et al. 2015	Selection bias: differences introduced across sampled sites by use of significantly different wastewater sampling method/strategy	high	Different sampling methodology between STWs (24H flow-proportional) and hospital effluent (4H limited-composite)	High
Surveillance of antimicrobial resistance among Escherichia coli in wastewater in Stockholm during 1 year: does it reflect the resistance trends in the society?	Kwak et al. 2015	Performance bias: differences introduced between sites and across comparison groups by the use of different processing/AMR detection approaches	low	Same processing/AMR detection methods used across sites	High
Surveillance of antimicrobial resistance among Escherichia coli in wastewater in Stockholm during 1 year: does it reflect the resistance trends in the society?	Kwak et al. 2015	Attrition bias: differences introduced by incomplete outcome data where data fields may be missing across comparison groups and longitudinal studies in particular may be missing timepoints due to logistical reasons	low	No missing data across sites	High
Surveillance of antimicrobial resistance among Escherichia coli in wastewater in Stockholm during 1 year: does it reflect the resistance trends in the society?	Kwak et al. 2015	Reporting bias: differences arising from selective reporting where outcomes may be measured but not reported or disproportionately reported compared to other outcomes	high	Reporting of specific antibiotics out of those tested (4/10) for comparison due to trend present for these four - remaining 6 not mentioned in terms of comparison despite having equivalent data in EARS-Net	High
Surveillance of antimicrobial resistance among Escherichia coli in wastewater in Stockholm during 1 year: does it reflect the resistance trends in the society?	Kwak et al. 2015	Other bias (confounding): confounding in reference to the uncertain presence of AMR/AMR-influencing sources which could have impacted study outcomes.	low	Sewer inputs reported (hospital and no agricultural input) - "There are no agricultural sources that contribute significantly to the wastewater. "	High
Population Screening Using Sewage Reveals Pan-Resistant Bacteria in Hospital and Community Samples	Meir-Gruber et al. 2016	Selection bias: differences introduced across sampled sites by use of significantly different wastewater sampling method/strategy	low	Sampling methods are the same/very similar across all STWs and sewer systems (24H composites made up of 24/48 subsamples)	High
Population Screening Using Sewage Reveals Pan-Resistant Bacteria in Hospital and Community Samples	Meir-Gruber et al. 2016	Performance bias: differences introduced between sites and across comparison groups by the use of different processing/AMR detection approaches	low	Same processing/AMR detection methods used across sites	High
Population Screening Using Sewage Reveals Pan-Resistant Bacteria in Hospital and Community Samples	Meir-Gruber et al. 2016	Attrition bias: differences introduced by incomplete outcome data where data fields may be missing across comparison groups and longitudinal studies in particular may be missing timepoints due to logistical reasons	low	No data missing across sites	High
Population Screening Using Sewage Reveals Pan-Resistant Bacteria in Hospital and Community Samples	Meir-Gruber et al. 2016	Reporting bias: differences arising from selective reporting where outcomes may be measured but not reported or disproportionately reported compared to other outcomes	high	Number of clinical isolates tested/included in analyses not reported while number of wastewater isolates included was reported - specific reporting of comparison presented as percentages with no total number of clinical isolates reported.	High
Population Screening Using Sewage Reveals Pan-Resistant Bacteria in Hospital and Community Samples	Meir-Gruber et al. 2016	Other bias (confounding): confounding in reference to the uncertain presence of AMR/AMR-influencing sources which could have impacted study outcomes.	low	Sewer inputs reported (hospital, nursing homes and domestic-only) and considered during analyses	High
Resistance patterns of Escherichia coli isolated from sewage sludge in comparison with those isolated from human patients in 2000 and 2009	Reinthaler et al. 2012	Selection bias: differences introduced across sampled sites by use of significantly different wastewater sampling method/strategy	high	Use of different same sampling method across timepoints with difference of one day - "sludge samples were collected from different sewage treatment plants on five sampling days each" and "The second set of samples was collected between April and September 2009 on six sampling days."	Unclear
Resistance patterns of Escherichia coli isolated from sewage sludge in comparison with those isolated from human patients in 2000 and 2009	Reinthaler et al. 2012	Performance bias: differences introduced between sites and across comparison groups by the use of different processing/AMR detection approaches	low	Same processing/AMR detection methods used across sites	Unclear
Resistance patterns of Escherichia coli isolated from sewage sludge in comparison with those isolated from human patients in 2000 and 2009	Reinthaler et al. 2012	Attrition bias: differences introduced by incomplete outcome data where data fields may be missing across comparison groups and longitudinal studies in particular may be missing timepoints due to logistical reasons	low	No data missing across sites	Unclear
Resistance patterns of Escherichia coli isolated from sewage sludge in comparison with those isolated from human patients in 2000 and 2009	Reinthaler et al. 2012	Reporting bias: differences arising from selective reporting where outcomes may be measured but not reported or disproportionately reported compared to other outcomes	unclear	unclear	Unclear
Resistance patterns of Escherichia coli isolated from sewage sludge in comparison with those isolated from human patients in 2000 and 2009	Reinthaler et al. 2012	Other bias (confounding): confounding in reference to the uncertain presence of AMR/AMR-influencing sources which could have impacted study outcomes.	low	Sewer inputs reported (no hospital input) - "Only sewage treatment plants which did not receive wastewater from hospitals were used for this study"	Unclear
Epidemiological Link Between Wastewater and Human Vancomycin-Resistant Enterococcus faecium Isolates	Talebi et al. 2008	Selection bias: differences introduced across sampled sites by use of significantly different wastewater sampling method/strategy	low	Use of same sampling method across sites for each timepoint - "Six samplings were done from three urban STPs (two each)"	Unclear
Epidemiological Link Between Wastewater and Human Vancomycin-Resistant Enterococcus faecium Isolates	Talebi et al. 2008	Performance bias: differences introduced between sites and across comparison groups by the use of different processing/AMR detection approaches	low	Same processing/AMR detection methods used across sites - " All samples were refrigerated and transported to the microbiology laboratory…"	Unclear
Epidemiological Link Between Wastewater and Human Vancomycin-Resistant Enterococcus faecium Isolates	Talebi et al. 2008	Attrition bias: differences introduced by incomplete outcome data where data fields may be missing across comparison groups and longitudinal studies in particular may be missing timepoints due to logistical reasons	low	No data missing across sites	Unclear
Epidemiological Link Between Wastewater and Human Vancomycin-Resistant Enterococcus faecium Isolates	Talebi et al. 2008	Reporting bias: differences arising from selective reporting where outcomes may be measured but not reported or disproportionately reported compared to other outcomes	unclear	unclear	Unclear
Epidemiological Link Between Wastewater and Human Vancomycin-Resistant Enterococcus faecium Isolates	Talebi et al. 2008	Other bias (confounding): confounding in reference to the uncertain presence of AMR/AMR-influencing sources which could have impacted study outcomes.	high	"Sewage samples were collected from three urban STPs located at different parts of Tehran", no details or sewer inputs reported. STW sampling point not reported.	Unclear
A comparison of extended spectrum β-lactamase producing Escherichia coli from clinical, recreational water and wastewater samples associated in time and location	Jorgensen et al. 2017	Selection bias: differences introduced across sampled sites by use of significantly different wastewater sampling method/strategy	low	Use of same sampling method for each timepoint at the one site	Unclear
A comparison of extended spectrum β-lactamase producing Escherichia coli from clinical, recreational water and wastewater samples associated in time and location	Jorgensen et al. 2017	Performance bias: differences introduced between sites and across comparison groups by the use of different processing/AMR detection approaches	low	Same processing/AMR detection methods used across comparison groups	Unclear
A comparison of extended spectrum β-lactamase producing Escherichia coli from clinical, recreational water and wastewater samples associated in time and location	Jorgensen et al. 2017	Attrition bias: differences introduced by incomplete outcome data where data fields may be missing across comparison groups and longitudinal studies in particular may be missing timepoints due to logistical reasons	high	Missing data on total E.coli CFU for one wastewater timepoint - prevents resistance proportion calculation for this timepoint	Unclear
A comparison of extended spectrum β-lactamase producing Escherichia coli from clinical, recreational water and wastewater samples associated in time and location	Jorgensen et al. 2017	Reporting bias: differences arising from selective reporting where outcomes may be measured but not reported or disproportionately reported compared to other outcomes	unclear	unclear	Unclear
A comparison of extended spectrum β-lactamase producing Escherichia coli from clinical, recreational water and wastewater samples associated in time and location	Jorgensen et al. 2017	Other bias (confounding): confounding in reference to the uncertain presence of AMR/AMR-influencing sources which could have impacted study outcomes.	unclear	No STW details reported "Daily flow proportional influent wastewater samples were collected from our local wastewater treatment plant" but STW catchment mentioned to include clinical comparison group	Unclear
Global monitoring of antimicrobial resistance based on metagenomics analyses of urban sewage Global monitoring of antimicrobial resistance based on metagenomics analyses of urban sewage	Aarestrup et al. 2019	Selection bias: differences introduced across sampled sites by use of significantly different wastewater sampling method/strategy	high	Different sampling methodology between sites (24H flow-proportional or limited-grab)	Unclear
Global monitoring of antimicrobial resistance based on metagenomics analyses of urban sewage	Aarestrup et al. 2019	Performance bias: differences introduced between sites and across comparison groups by the use of different processing/AMR detection approaches	low	Same processing/AMR detection methods used across sites	Unclear
Global monitoring of antimicrobial resistance based on metagenomics analyses of urban sewage	Aarestrup et al. 2019	Attrition bias: differences introduced by incomplete outcome data where data fields may be missing across comparison groups and longitudinal studies in particular may be missing timepoints due to logistical reasons	high	The samples of the first of the consecutive days were sequenced for 80 sites - results from 79 reported.	Unclear
Global monitoring of antimicrobial resistance based on metagenomics analyses of urban sewage	Aarestrup et al. 2019	Reporting bias: differences arising from selective reporting where outcomes may be measured but not reported or disproportionately reported compared to other outcomes	unclear	unclear	Unclear
Global monitoring of antimicrobial resistance based on metagenomics analyses of urban sewage	Aarestrup et al. 2019	Other bias (confounding): confounding in reference to the uncertain presence of AMR/AMR-influencing sources which could have impacted study outcomes.	low	Sewer inputs reported	Unclear
Pathogen surveillance in the informal settlement, Kibera, Kenya, using a metagenomics approach	Hendriksen et al. 2019	Selection bias: differences introduced across sampled sites by use of significantly different wastewater sampling method/strategy	low	Use of same sampling method across sites and timepoints	Unclear
Pathogen surveillance in the informal settlement, Kibera, Kenya, using a metagenomics approach	Hendriksen et al. 2019	Performance bias: differences introduced between sites and across comparison groups by the use of different processing/AMR detection approaches	low	Same processing/AMR detection methods used across sites	Unclear
Pathogen surveillance in the informal settlement, Kibera, Kenya, using a metagenomics approach	Hendriksen et al. 2019	Attrition bias: differences introduced by incomplete outcome data where data fields may be missing across comparison groups and longitudinal studies in particular may be missing timepoints due to logistical reasons	low	No data missing across sites	Unclear
Pathogen surveillance in the informal settlement, Kibera, Kenya, using a metagenomics approach	Hendriksen et al. 2019	Reporting bias: differences arising from selective reporting where outcomes may be measured but not reported or disproportionately reported compared to other outcomes	unclear	unclear	Unclear
Pathogen surveillance in the informal settlement, Kibera, Kenya, using a metagenomics approach	Hendriksen et al. 2019	Other bias (confounding): confounding in reference to the uncertain presence of AMR/AMR-influencing sources which could have impacted study outcomes.	unclear	village demographics reported but no defining of additional AMR sources - unlikely due to village size	Unclear
Genomic surveillance of Escherichia coli in municipal wastewater treatment plants as an indicator of clinically relevant pathogens and their resistance genes.	Raven et al. 2019	Selection bias: differences introduced across sampled sites by use of significantly different wastewater sampling method/strategy	low	Use of same sampling method across sites and timepoints	Low
Genomic surveillance of Escherichia coli in municipal wastewater treatment plants as an indicator of clinically relevant pathogens and their resistance genes.	Raven et al. 2019	Performance bias: differences introduced between sites and across comparison groups by the use of different processing/AMR detection approaches	low	Same processing/AMR detection methods used across sites	Low
Genomic surveillance of Escherichia coli in municipal wastewater treatment plants as an indicator of clinically relevant pathogens and their resistance genes.	Raven et al. 2019	Attrition bias: differences introduced by incomplete outcome data where data fields may be missing across comparison groups and longitudinal studies in particular may be missing timepoints due to logistical reasons	low	No data missing across sites	Low
Genomic surveillance of Escherichia coli in municipal wastewater treatment plants as an indicator of clinically relevant pathogens and their resistance genes.	Raven et al. 2019	Reporting bias: differences arising from selective reporting where outcomes may be measured but not reported or disproportionately reported compared to other outcomes	unclear	unclear	Low
Genomic surveillance of Escherichia coli in municipal wastewater treatment plants as an indicator of clinically relevant pathogens and their resistance genes.	Raven et al. 2019	Other bias (confounding): confounding in reference to the uncertain presence of AMR/AMR-influencing sources which could have impacted study outcomes.	low	Hospital inputs defined and considered in analyses - "Of these (STWs), 10 were located downstream of acute hospitals and 10 did not directly receive hospital waste."	Low
Interconnected microbiomes and resistomes in low-income human habitats	Pehrsson et al. 2016	Selection bias: differences introduced across sampled sites by use of significantly different wastewater sampling method/strategy	unclear	Sampling method not reported - "Sewage influent (pre-treatment) and effluent (post-treatment) samples from the wastewater treatment plant ‘PTAR San Juan’, located in the vicinity of PST, were collected in collaboration with Water and Sewage Authority of Lima (SEDAPAL)."	Unclear
Interconnected microbiomes and resistomes in low-income human habitats	Pehrsson et al. 2016	Performance bias: differences introduced between sites and across comparison groups by the use of different processing/AMR detection approaches	low	Sample processing and DNA extraction method was the same for the comparison groups of interest: Wastewater - "metagenomic DNA was isolated using the phenol-chloroform extraction protocol used for faecal samples".	Unclear
Interconnected microbiomes and resistomes in low-income human habitats	Pehrsson et al. 2016	Attrition bias: differences introduced by incomplete outcome data where data fields may be missing across comparison groups and longitudinal studies in particular may be missing timepoints due to logistical reasons	unclear	Collection of human faecal comparison group likely to have missed timepoints "We sampled 3.6 ± 2.0 individuals per house in RES and 5.7 ± 3.0 in PST. " but unclear	Unclear
Interconnected microbiomes and resistomes in low-income human habitats	Pehrsson et al. 2016	Reporting bias: differences arising from selective reporting where outcomes may be measured but not reported or disproportionately reported compared to other outcomes	unclear	unclear	Unclear
Interconnected microbiomes and resistomes in low-income human habitats	Pehrsson et al. 2016	Other bias (confounding): confounding in reference to the uncertain presence of AMR/AMR-influencing sources which could have impacted study outcomes.	high	Large STW with PE of 700000 but no sewage inputs defined other than "shanty towns" with no indication of healthcare/agricultural inputs that may be present	Unclear
Low overlap between carbapenem resistant Pseudomonas aeruginosa genotypes isolated from hospitalized patients and wastewater treatment plants	Golle et al. 2017	Selection bias: differences introduced across sampled sites by use of significantly different wastewater sampling method/strategy	low	Sampling method not explicitly described but intervals are the same and method likely to remain consistent also - "Effluents from both WWTPs were sampled monthly for one-year period."	low
Low overlap between carbapenem resistant Pseudomonas aeruginosa genotypes isolated from hospitalized patients and wastewater treatment plants	Golle et al. 2017	Performance bias: differences introduced between sites and across comparison groups by the use of different processing/AMR detection approaches	low	Sample processing and AMR detection method was the same for both sites and clinical comparison group - "All isolates confirmed as P. aeruginosa were submitted for identical antibiotic susceptibility testing as described above for clinical strains."	low
Low overlap between carbapenem resistant Pseudomonas aeruginosa genotypes isolated from hospitalized patients and wastewater treatment plants	Golle et al. 2017	Attrition bias: differences introduced by incomplete outcome data where data fields may be missing across comparison groups and longitudinal studies in particular may be missing timepoints due to logistical reasons	low	No data missing across sites	low
Low overlap between carbapenem resistant Pseudomonas aeruginosa genotypes isolated from hospitalized patients and wastewater treatment plants	Golle et al. 2017	Reporting bias: differences arising from selective reporting where outcomes may be measured but not reported or disproportionately reported compared to other outcomes	unclear	unclear	low
Low overlap between carbapenem resistant Pseudomonas aeruginosa genotypes isolated from hospitalized patients and wastewater treatment plants	Golle et al. 2017	Other bias (confounding): confounding in reference to the uncertain presence of AMR/AMR-influencing sources which could have impacted study outcomes.	low	Hospital and community inputs defined for each STW, and considered in analyses - STW A " and would collect community sewage water in region associated with hospital A", STW B "and would collect also community sewage water associated with hospital B."	low
Detection of vancomycin-resistant Enterococcus faecium hospital-adapted lineages in municipal wastewater treatment plants indicates widespread distribution and release into the environment.	Gouliouris et al. 2019	Selection bias: differences introduced across sampled sites by use of significantly different wastewater sampling method/strategy	low	Use of same sampling method across sites and timepoints	low
Detection of vancomycin-resistant Enterococcus faecium hospital-adapted lineages in municipal wastewater treatment plants indicates widespread distribution and release into the environment.	Gouliouris et al. 2019	Performance bias: differences introduced between sites and across comparison groups by the use of different processing/AMR detection approaches	low	Same processing/AMR detection methods used across sites	low
Detection of vancomycin-resistant Enterococcus faecium hospital-adapted lineages in municipal wastewater treatment plants indicates widespread distribution and release into the environment.	Gouliouris et al. 2019	Attrition bias: differences introduced by incomplete outcome data where data fields may be missing across comparison groups and longitudinal studies in particular may be missing timepoints due to logistical reasons	low	No data missing across sites	low
Detection of vancomycin-resistant Enterococcus faecium hospital-adapted lineages in municipal wastewater treatment plants indicates widespread distribution and release into the environment.	Gouliouris et al. 2019	Reporting bias: differences arising from selective reporting where outcomes may be measured but not reported or disproportionately reported compared to other outcomes	unclear	unclear	low
Detection of vancomycin-resistant Enterococcus faecium hospital-adapted lineages in municipal wastewater treatment plants indicates widespread distribution and release into the environment.	Gouliouris et al. 2019	Other bias (confounding): confounding in reference to the uncertain presence of AMR/AMR-influencing sources which could have impacted study outcomes.	low	Hospital inputs defined and considered in analyses - "20 municipal treatment plants in the East of England, half of which were not in direct receipt of hospital waste"	low
Molecular epidemiology of ampicillin resistance in Salmonella spp. and Escherichia coli from wastewater and clinical specimens.	Pignato et al. 2010	Selection bias: differences introduced across sampled sites by use of significantly different wastewater sampling method/strategy	high	Different sampling interval between sites (every 2 weeks and every month) - "processed every 2 weeks (Plant A) or every month (Plant B)"	Unclear
Molecular epidemiology of ampicillin resistance in Salmonella spp. and Escherichia coli from wastewater and clinical specimens.	Pignato et al. 2010	Performance bias: differences introduced between sites and across comparison groups by the use of different processing/AMR detection approaches	low	Same processing/AMR detection methods used across sites and comparison groups - "Isolates were screened for resistance to eight antibiotics…"	Unclear
Molecular epidemiology of ampicillin resistance in Salmonella spp. and Escherichia coli from wastewater and clinical specimens.	Pignato et al. 2010	Attrition bias: differences introduced by incomplete outcome data where data fields may be missing across comparison groups and longitudinal studies in particular may be missing timepoints due to logistical reasons	low	No data missing across sites	Unclear
Molecular epidemiology of ampicillin resistance in Salmonella spp. and Escherichia coli from wastewater and clinical specimens.	Pignato et al. 2010	Reporting bias: differences arising from selective reporting where outcomes may be measured but not reported or disproportionately reported compared to other outcomes	unclear	unclear	Unclear
Molecular epidemiology of ampicillin resistance in Salmonella spp. and Escherichia coli from wastewater and clinical specimens.	Pignato et al. 2010	Other bias (confounding): confounding in reference to the uncertain presence of AMR/AMR-influencing sources which could have impacted study outcomes.	low	Sewer inputs defined - "No wastes from farms or slaughterhouses inflowed to the urban wastewater that were treated in the two plants."	Unclear
