# Supplementary material for: Wastewater Surveillance of Antimicrobial Resistance in Human Populations: A Systematic Review
Source: Preprints.org preprint supplement (doi:10.20944/preprints202010.0267.v1), 2020-10-13
Supplement: Supplementary file 4 [file supplementary]

## Data extraction template

| Field                                                                                                                                 | Data input                               |
|---------------------------------------------------------------------------------------------------------------------------------------|------------------------------------------|
| Title                                                                                                                                 | (write-in)                               |
| DOI                                                                                                                                   | (write-in)                               |
| Citation                                                                                                                              | (write-in)                               |
| Year published                                                                                                                        | (write-in)                               |
| Country/s                                                                                                                             | (write-in)                               |
| wb_ea_pacific                                                                                                                         | (1/0)                                    |
| wb_europe_ca                                                                                                                          | (1/0)                                    |
| wb_la_carib                                                                                                                           | (1/0)                                    |
| wa_middlee_nafrica                                                                                                                    | (1/0)                                    |
| wb_na                                                                                                                                 | (1/0)                                    |
| wb_sasia                                                                                                                              | (1/0)                                    |
| wb_ssafrica                                                                                                                           | (1/0)                                    |
| wb_high_income                                                                                                                        | (1/0)                                    |
| wb_middle_income                                                                                                                      | (1/0)                                    |
| wb_low_income                                                                                                                         | (1/0)                                    |
| Self-defined sewage surveillance study<br>i.e. states the use of wastewater for<br>monitoring AMR prevalence in a human<br>population | (1/0)                                    |
| Self-defined aim                                                                                                                      | (write-in)                               |
| test_approach                                                                                                                         | (culture/qPCR/sequencing)                |
| target_organism                                                                                                                       | (write-in)                               |
| target_resistance_pheno                                                                                                               | (write-in)                               |
| target_resistance_geno                                                                                                                | (write-in)                               |
| STW sampling method                                                                                                                   | (grab/composite/flow-proportional/mixed) |
| STW sampling method<br>subsampling/timeframe                                                                                          | (write-in)                               |
| Other sampling method and sampling<br>point                                                                                           | (grab/composite/flow-proportional)       |
| STW sampling point                                                                                                                    | (influent/sludge/effluent/sewer)         |
| STW sampling point detail                                                                                                             | (write-in)                               |
| STW and sewershed description                                                                                                         | (write-in)                               |
| Defined sewer inputs                                                                                                                  | (1/0)                                    |
| Hospital input                                                                                                                        | (1/0)                                    |
| Agriculture input                                                                                                                     | (1/0)                                    |
| Industry input                                                                                                                        | (1/0)                                    |
| Slaughterhouse input                                                                                                                  | (1/0)                                    |
| Other sewer input                                                                                                                     | (write-in)                               |
| sewershed_flow_m3_day                                                                                                                 | (write-in)                               |
| sewershed_popn_equiv                                                                                                                  | (write-in)                               |
| No. of STWs sampled                                                                                                                   | (write-in)                               |
| Sampling method detail                                                                                                                | (write-in)                               |
| No. of wastewater samples + timeframe                                                                                                 | (write-in)                               |
| sampling_year                                                                                                                         | (write-in)                               |
| sampling_season_hemisphere_specific                                                                                                   | (write-in)                               |
| Snapshot (sites sampled once only) or<br>longitudinal (sites sampled repeatedly)<br>sampling                                          | (snapshot/longitudinal)                  |

| Field                                                                                           | Data input                       |
|-------------------------------------------------------------------------------------------------|----------------------------------|
| If longitudinal: timeframe in months (inclusive) and (sampling interval)                        | (write-in)                       |
| longitudinal_timeframe_mths                                                                     | (write-in)                       |
| longitudinal_interval_mths                                                                      | (write-in)                       |
| DNA sequencing                                                                                  | (1/0)                            |
| AMR detection method detail (no. of ABX/genes tested)                                           | (write-in)                       |
| antibiotic_pheno_method                                                                         | (write-in)                       |
| antibiotic_geno_method                                                                          | (write-in)                       |
| Additional relevant methods                                                                     | (write-in)                       |
| Human component                                                                                 | (write-in)                       |
| Relevant comparison/s                                                                           | (write-in)                       |
| temporal_comparison                                                                             | (1/0)                            |
| geographic_comparison                                                                           | (1/0)                            |
| Direct/indirect comparison (sampled human component directly contributes to wastewater element) | (direct/indirect)                |
| Statistical/biostatistical tests for sewage vs human component association analyses             | (write-in)                       |
| Relevant findings                                                                               | (write-in)                       |
| Sewage resistances reflect human component?                                                     | (positive/negative/inconclusive) |
